# Supplementary material for: Molecular basis of AKAP79 regulation by calmodulin
Source: PubMed Central journal article supplement (PMC5698441; doi:10.1038/s41467-017-01715-w), 2017-11-22
Supplement: 41467_2017_1715_MOESM1_ESM.pdf [file 41467_2017_1715_MOESM1_ESM.pdf]

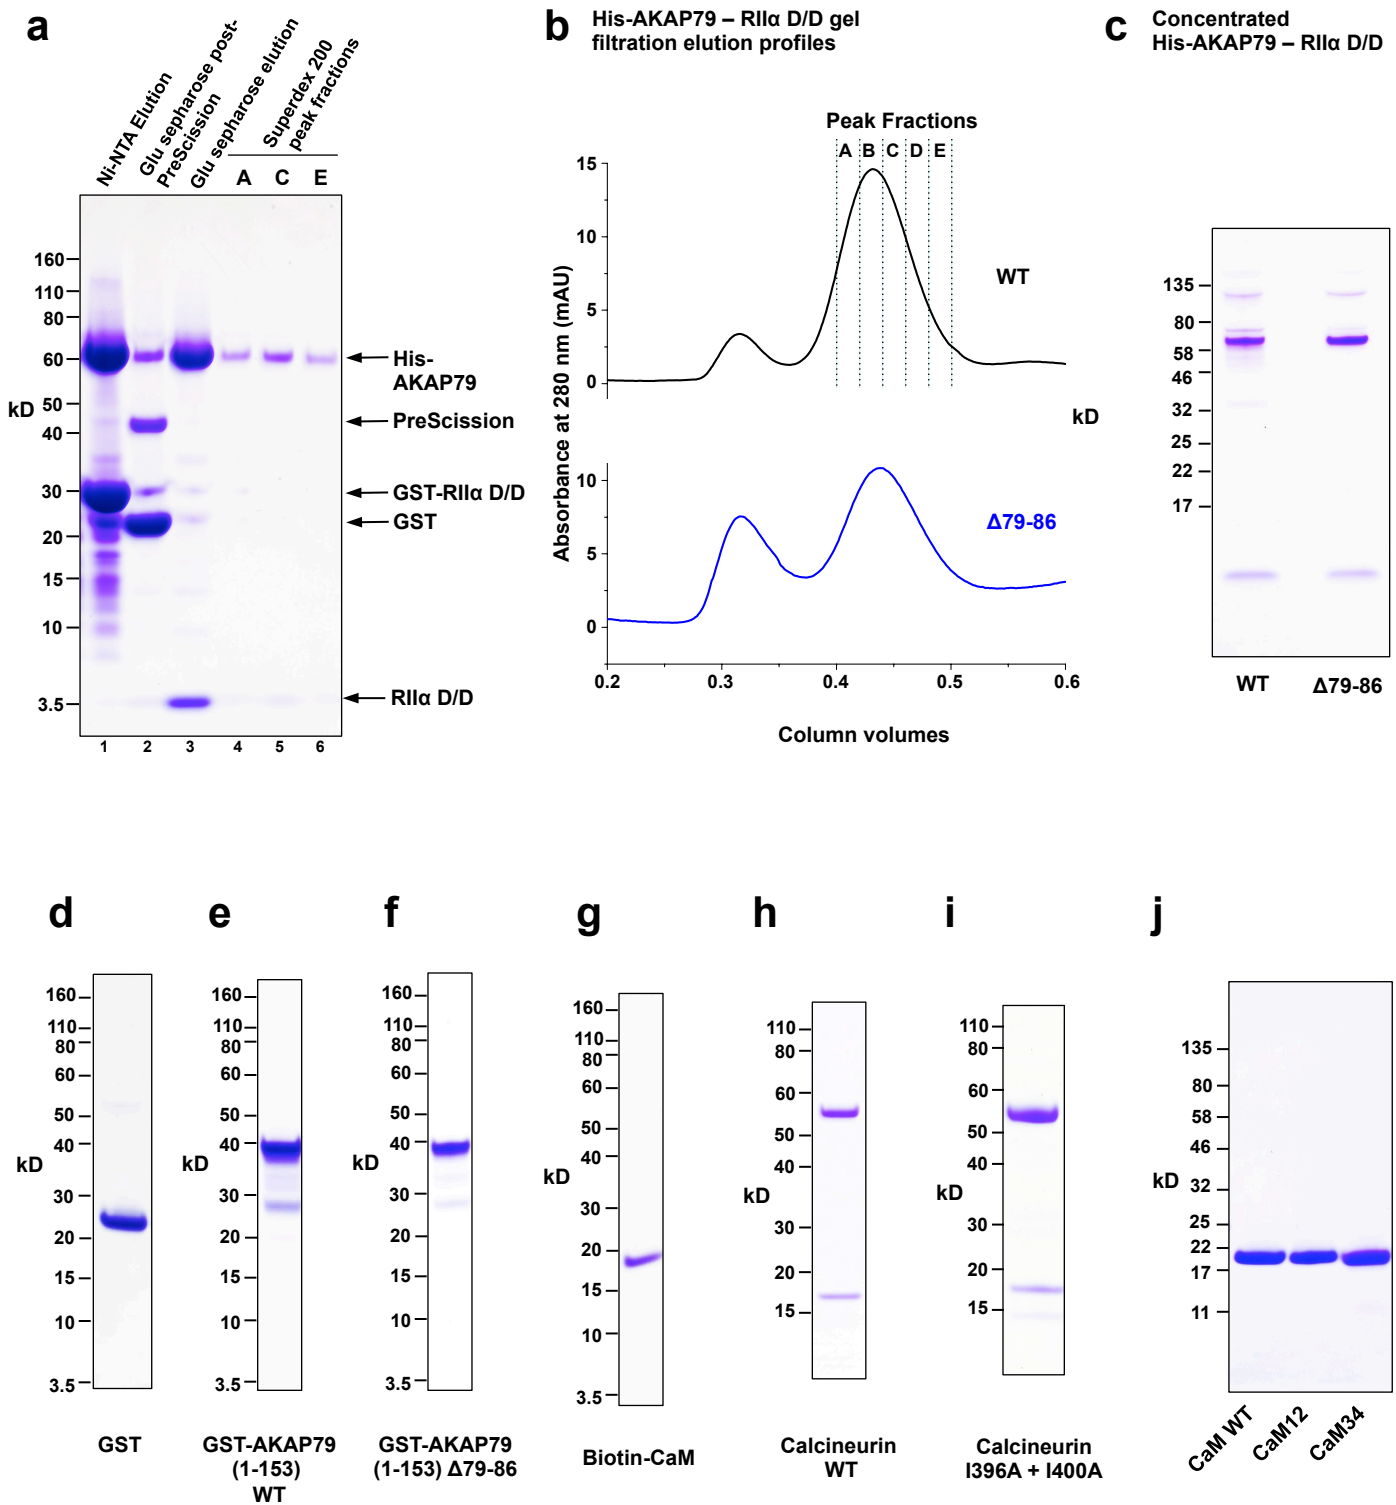

**Supplementary Figure 1. Preparation of purified proteins** (a) Coomassie-stained 4-12 % SDS-polyacrylamide gel showing sequential purification of His-AKAP79-D/D. The lanes show sample after elution from Ni-NTA agarose (lane 1), the bead (lane 2) and eluate (lane 3) fractions following incubation of glutathione sepharose beads with PreScission protease, and peak fractions eluted from a Superdex 200 column (lanes 4-6). (b) Relationship between 280 nm absorbance and elution volume for WT (upper trace) and  $\Delta 79-86$  (lower trace) AKAP79-D/D in the final SEC purification step. Both proteins eluted with a peak volume of  $\sim 0.43$  column volumes. (c) Coomassie gel showing purified WT and  $\Delta 79-86$  AKAP79-D/D following concentration. (d)-(j) Coomassie-stained gels showing purity of the following proteins that were utilised during the investigation: GST (d), fusions of WT (e) and  $\Delta 79-86$  (f) AKAP79 (1-153) at the C-terminus of GST, biotin-labelled CaM (g), WT (h) and I396A/I400A (i) calcineurin, and three variants of unlabeled CaM (j).

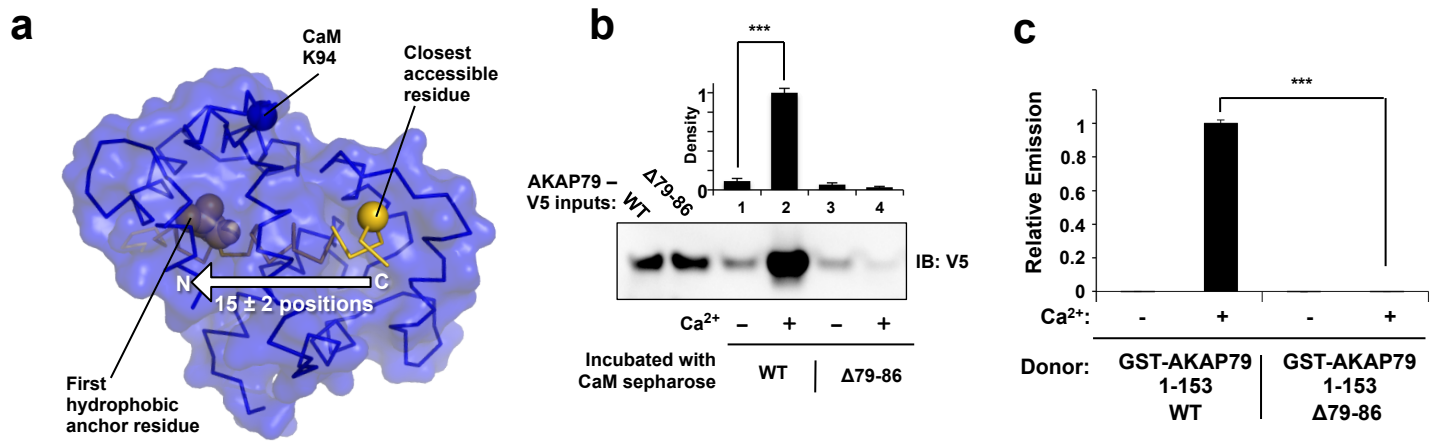

**Supplementary Figure 2. Triangulation of the CaM binding site in AKAP79** (a) To predict where the CaM interaction helix in AKAP79 could fall on the basis of the XL-MS data, we analysed a representative selection of five Ca<sup>2+</sup>/CaM - target complex structures (two 1-8-14 class motifs: 2LV6, 2JZI; two 1-5-10 class motifs: 2WEL, 1MXE; one atypical motif: 2KDU) with the aim of determining where Lys94<sub>CaM</sub> would be expected to crosslink most efficiently in each target in relation to the first hydrophobic anchor position. We calculated the distances of solvent-accessible amino acids in each target from Lys94<sub>CaM</sub> using NCONT. Amino acids were considered accessible when their accessible surface constituted > 0.4 of their total surface area. This analysis predicted that on average K94<sub>CaM</sub> would crosslink most efficiently at a position ~ 15 amino acids C-terminal to the first hydrophobic anchor position in the target's primary sequence, as shown in the cartoon. (b) Pull-down of either WT or  $\Delta 79-86$  C-terminally V5-tagged full-length AKAP79 with CaM sepharose, with or without Ca<sup>2+</sup>. AKAP79 pull-down was detected by anti-V5 immunoblotting (n=4). Ca<sup>2+</sup> increased binding of WT AKAP79 by 11-fold ( $p = 1.7 \times 10^{-5}$ ) according to densitometry, whereas the  $\Delta 79-86$  variant did not bind efficiently irrespective of Ca<sup>2+</sup>. (c) Alphascreen recordings of biotin-CaM association with WT or  $\Delta 79-86$  GST-AKAP79 (1-153). Recordings were performed either with or without Ca<sup>2+</sup> (n=6). Removal of amino acids 79-86 abolished interaction with CaM, according to this assay. \*\*\* $P < 0.001$  by two-tailed Student's t test. Error bars show s.e.m.

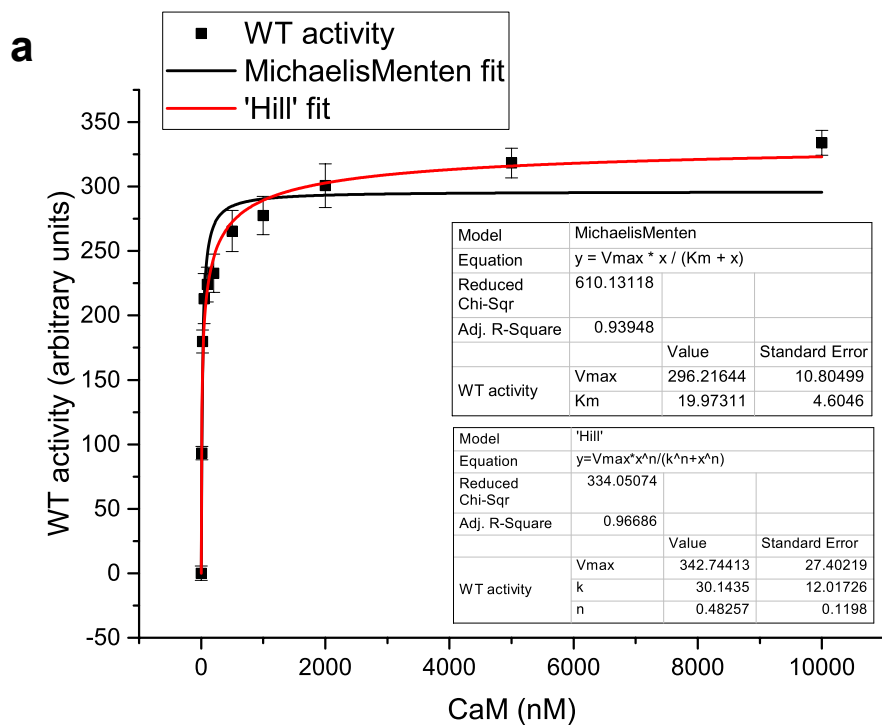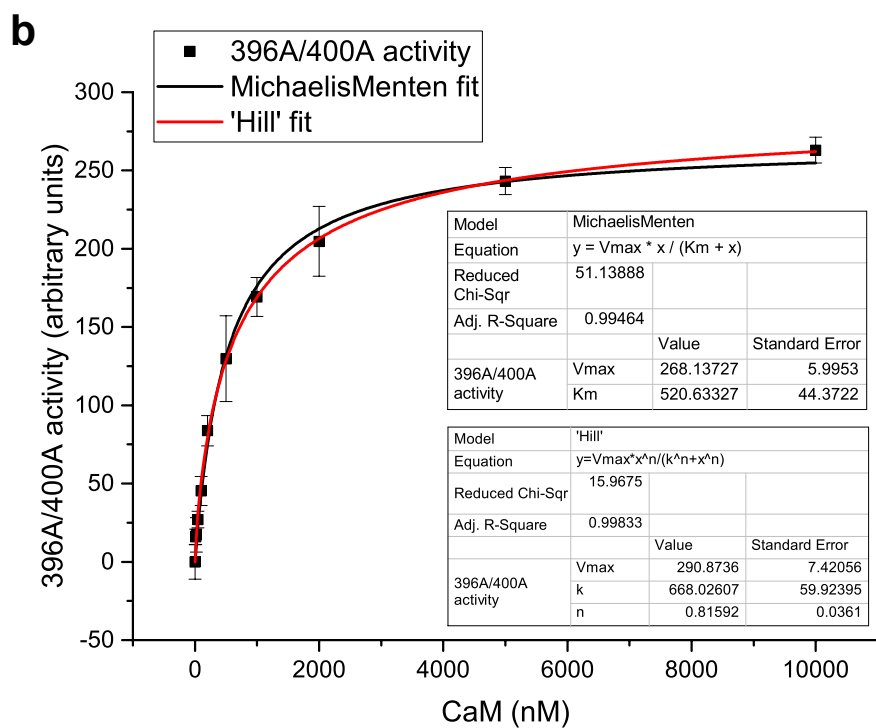

**Supplementary Figure 3. Relationship of calcineurin WT and I396A/I400A activity to CaM concentration.** Detailed results are shown for curve fitting to model the relationship between CaM concentration and either WT (a) or I396A/400A (b) calcineurin activity (n=3). Curve fitting was performed in ORIGIN using the Michaelis-Menten equation either with (red line) or without (black line) a cooperativity variable ('n'). The cooperativity term substantially improved the fit for WT calcineurin, so  $K_{CaM}$  values were derived from these curves (red lines). Calculated parameters are shown in the inset boxes. Error bars show s.e.m.

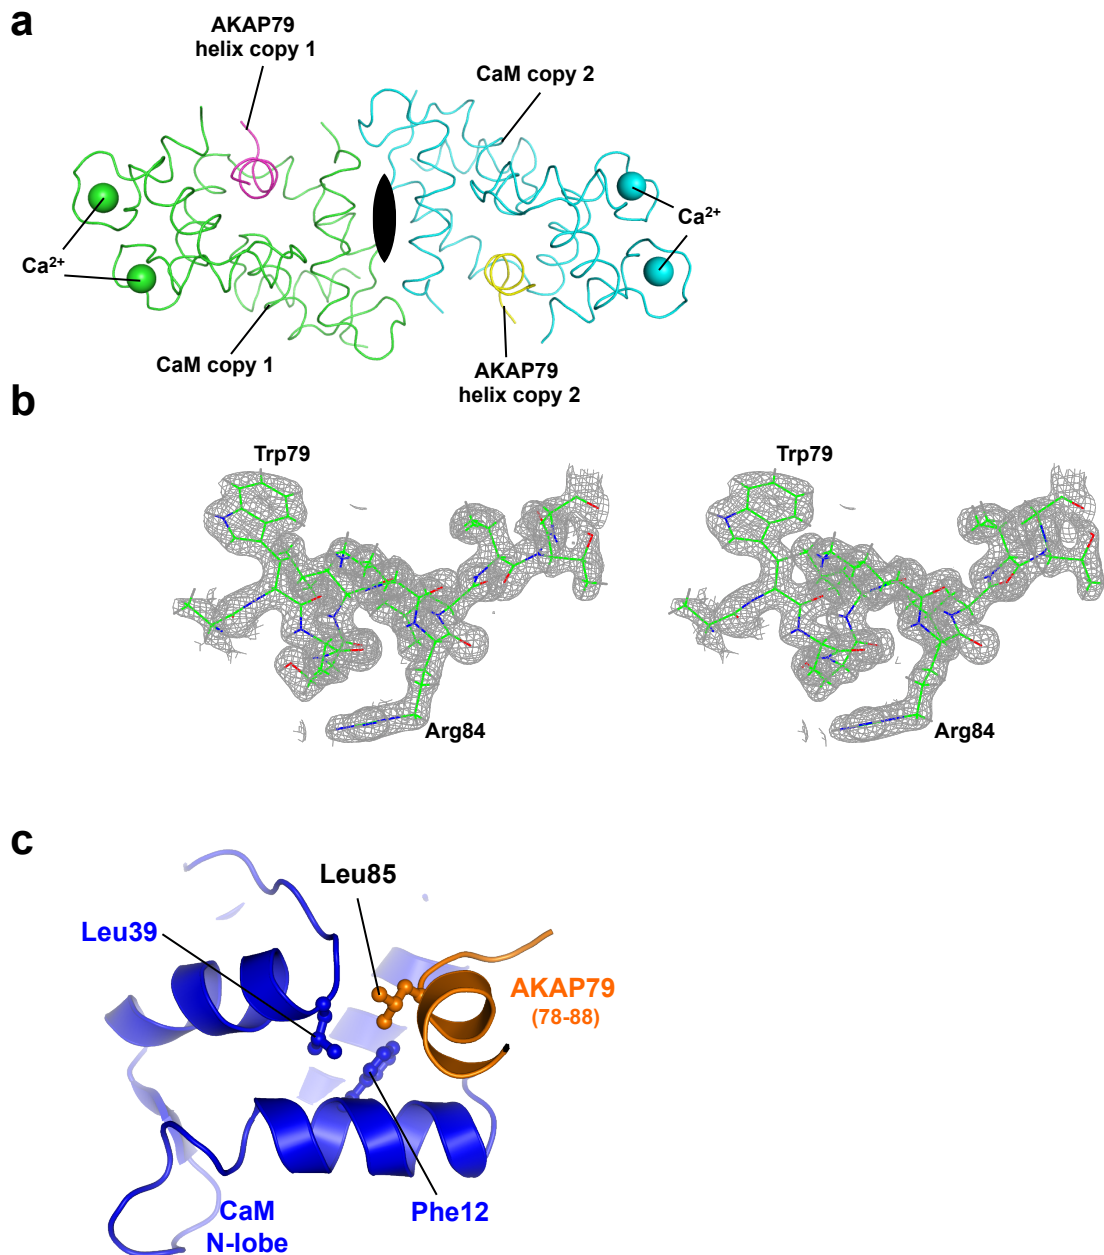

**Supplementary Figure 4. Features of the CaM – AKAP79 peptide crystal structure.** (a) Asymmetric unit showing two copies of the CaM-AKAP79 complex related to each other by a two-fold rotational symmetry axis. Each copy of CaM coordinates two  $\text{Ca}^{2+}$  ions through its C-lobes as indicated. (b) Stereo projections of the  $2F_o - F_c$  electron density map contoured at  $1 \sigma$  clipped within  $1.5 \text{ \AA}$  of Chain D (AKAP79 amino acids 78-88) using CCP4MG. (c) Close-up highlighting van der Waals interactions between N-lobe amino acids  $\text{L39}_{\text{CaM}}$  and  $\text{F12}_{\text{CaM}}$  and  $\text{L85}_{\text{AKAP79}}$ .

| P   | G   | A   | C   | S   | T   | V   | I   | L   | M   | F   | Y   | W   | H   | K | R | Q   | N   | D   | E   |
|-----|-----|-----|-----|-----|-----|-----|-----|-----|-----|-----|-----|-----|-----|---|---|-----|-----|-----|-----|
| 1   | 1   | 1   | 1   | 1   | 1   | 1   | 1   | 1   | 1   | 1   | 1   | 1   | 1   | 1 | 1 | 1   | 1   | 1   | 1   |
| 1   | 1   | 1   | 1   | 1   | 1   | 1   | 1   | 1   | 1   | 1   | 1   | 1   | 1   | 1 | 1 | 1   | 1   | 1   | 1   |
| 1   | 1   | 1   | 1   | 1   | 1   | 1   | 1   | 1   | 1   | 1   | 1   | 1   | 1   | 1 | 1 | 1   | 1   | 1   | 1   |
| 1   | 1   | 1   | 1   | 1   | 1   | 1   | 1   | 1   | 1   | 1   | 1   | 1   | 1   | 1 | 1 | 1   | 1   | 1   | 1   |
| 1   | 1   | 1   | 1   | 1   | 1   | 1   | 1   | 1   | 1   | 1   | 1   | 1   | 1   | 1 | 1 | 1   | 1   | 1   | 1   |
| 1   | 1   | 1   | 1   | 1   | 1   | 1   | 1   | 1   | 1   | 1   | 1   | 1   | 1   | 1 | 1 | 1   | 1   | 1   | 1   |
| 1   | 1   | 1   | 1   | 1   | 1   | 1   | 1   | 1   | 1   | 1   | 1   | 1   | 1   | 1 | 1 | 1   | 1   | 1   | 1   |
| 1   | 1   | 1   | 1   | 1   | 1   | 1   | 1   | 1   | 1   | 1   | 1   | 1   | 1   | 1 | 1 | 1   | 1   | 1   | 1   |
| 0   | 0   | 0   | 0   | 0   | 0   | 0   | 0   | 0   | 0   | 0   | 0   | 21  | 0   | 0 | 0 | 0   | 0   | 0   | 0   |
| 1   | 1   | 1   | 1   | 1   | 1   | 1   | 1   | 1   | 1   | 1   | 1   | 1   | 1   | 1 | 1 | 1   | 1   | 1   | 1   |
| 0   | 0   | 0   | 0   | 10  | 6   | 0   | 0   | 0   | 0   | 0   | 0   | 0   | 0   | 0 | 0 | 0   | 0   | 5   | 0   |
| 0   | 0   | 0   | 0   | 0   | 0   | 3   | 3   | 13  | 1   | 1   | 0   | 0   | 0   | 0 | 0 | 0   | 0   | 0   | 0   |
| 0.5 | 0.5 | 0.5 | 0.5 | 0.5 | 0.5 | 0.5 | 0.5 | 0.5 | 0.5 | 0.5 | 0.5 | 0.5 | 0.5 | 6 | 6 | 0.5 | 0.5 | 0.5 | 0.5 |
| 0.5 | 0.5 | 0.5 | 0.5 | 0.5 | 0.5 | 0.5 | 0.5 | 0.5 | 0.5 | 0.5 | 0.5 | 0.5 | 0.5 | 6 | 6 | 0.5 | 0.5 | 0.5 | 0.5 |
| 0   | 0   | 0   | 0   | 0   | 0   | 3   | 3   | 13  | 1   | 1   | 0   | 0   | 0   | 0 | 0 | 0   | 0   | 0   | 0   |
| 0   | 0   | 0   | 0   | 0   | 0   | 13  | 3   | 3   | 1   | 1   | 0   | 0   | 0   | 0 | 0 | 0   | 0   | 0   | 0   |

**Supplementary Figure 5. 1-4-7-8 motif search matrix.** The matrix was used as an input to Scansite 3 to search for potential '1-4-7-8'-type CaM interaction motifs.

Figure 1b

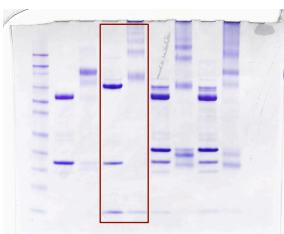

Figure 1c

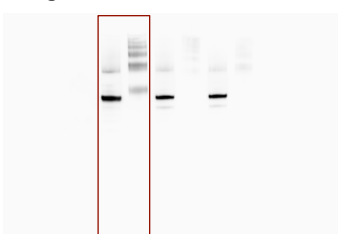

Figure 1d

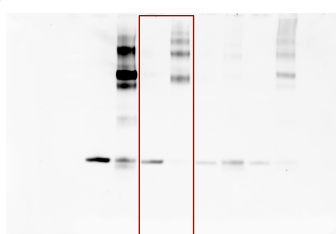

Figure 3a, top panel

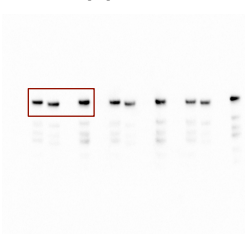

Figure 3a, middle panel

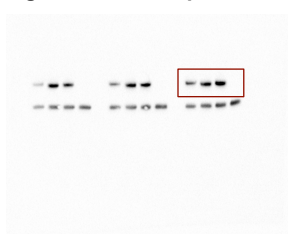

Figure 3a, bottom panel

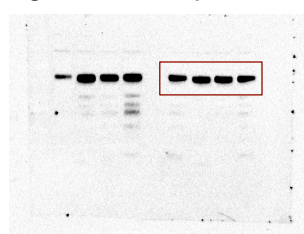

Figure 4c, top panel

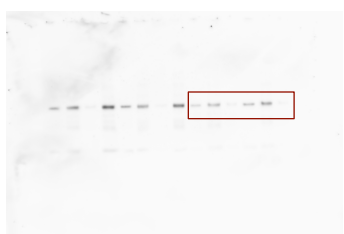

Figure 4c, bottom panel

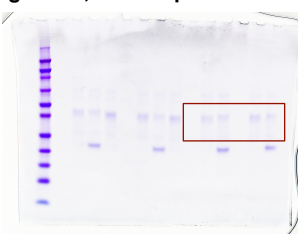

Figure 4e

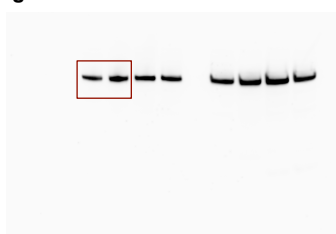

Figure 5d

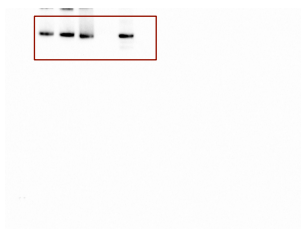

Supplementary Figure 1a

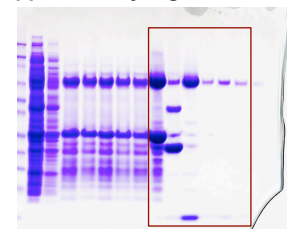

Supplementary Figure 1c

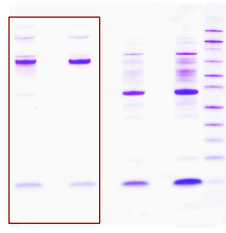

Supplementary Figure 1d,e,f,g

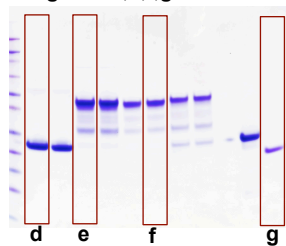

Supplementary Figure 1h,i

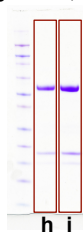

Supplementary Figure 1j

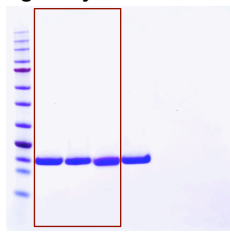

Supplementary Figure 2b

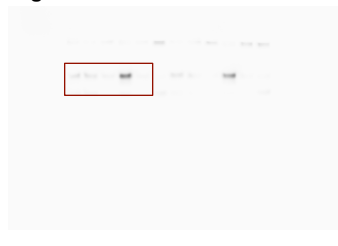

Supplementary Figure 6. Uncropped images of blots and gels used in the main and supplementary figures.

## Supplementary Table 1

| INTERLINKS<br>Sequence                               | Protein 1 | Protein 2  | Type      | Position 1 | Position 2 | deltaS | Id-Score | False discovery rate (%) | Frequency |
|------------------------------------------------------|-----------|------------|-----------|------------|------------|--------|----------|--------------------------|-----------|
| KKAAK-VFDKDGNGYISAAELR-a1-b4                         | AKAP79    | Calmodulin | interlink | 41         | 94         | 0.26   | 34.49    | 0                        | 1         |
| EAFSLFDKDGDTITTK-GAWASLKR-EAFSLFDKDGDTITTK-a7-b8     | AKAP79    | Calmodulin | interlink | 83         | 21         | 0.39   | 39.2     | 0                        | 1         |
| KRSESSK-EAFSLFDKDGDTITTK-a1-b8                       | AKAP79    | Calmodulin | interlink | 90         | 21         | 0      | 29.86    | 0                        | 1         |
| SESSKQKPLEGEMQPAINAEDADLSK-KMKDSEEEIREAFR-a5-b1      | AKAP79    | Calmodulin | interlink | 96         | 75         | 0.93   | 24.69    | 0                        | 1         |
| SESSKQKPLEGEMQPAINAEDADLSK-EAFSLFDKDGDTITTK-a8-b8    | AKAP79    | Calmodulin | interlink | 99         | 21         | 0      | 35.03    | 0                        | 1         |
| KAKSR-MKDTSEEEIREAFR-a1-b2                           | AKAP79    | Calmodulin | interlink | 120        | 77         | 0      | 36.83    | 0                        | 1         |
| KAKSR-VFDKDGNGYISAAEL-a1-b4                          | AKAP79    | Calmodulin | interlink | 120        | 94         | 0.38   | 29.06    | 0                        | 1         |
| KAKSR-MKDTSEEEIREAFR-a3-b2                           | AKAP79    | Calmodulin | interlink | 122        | 77         | 0      | 29.69    | 0                        | 1         |
| VQEEAELDIQTPLNDQATKAK-VFDKDGNGYISAAELR-a22-b4        | AKAP79    | Calmodulin | interlink | 175        | 94         | 0.59   | 31.72    | 0                        | 1         |
| ALKPKAGSEAADVAR-VFDKDGNGYISAAELR-a3-b4               | AKAP79    | Calmodulin | interlink | 48         | 94         | 0.26   | 36.6     | 0                        | 2         |
| ALKPK-EAFSLFDKDGDTITTK-a3-b8                         | AKAP79    | Calmodulin | interlink | 48         | 21         | 0.22   | 36.57    | 0                        | 2         |
| ALKPK-VFDKDGNGYISAAELR-a3-b4                         | AKAP79    | Calmodulin | interlink | 48         | 94         | 0.26   | 33.89    | 0                        | 2         |
| ALKPKAGSEAADVAR-EAFSLFDKDGDTITTK-a3-b8               | AKAP79    | Calmodulin | interlink | 48         | 21         | 0.21   | 29.63    | 0                        | 2         |
| ALKPKAGSEAADVAR-VFDKDGNGYISAAELR-a5-b4               | AKAP79    | Calmodulin | interlink | 50         | 94         | 0      | 40.93    | 0                        | 2         |
| ALKPKAGSEAADVAR-VFDKDGNGYISAAELR-a5-b4               | AKAP79    | Calmodulin | interlink | 50         | 94         | 0.12   | 37.78    | 0                        | 2         |
| QQKPLEGEMQPAINAEDADLSK-VFDKDGNGYISAAELR-a22-b4       | AKAP79    | Calmodulin | interlink | 118        | 94         | 0.61   | 32.69    | 0                        | 2         |
| QQKPLEGEMQPAINAEDADLSK-VFDKDGNGYISAAELR-a22-b4       | AKAP79    | Calmodulin | interlink | 118        | 94         | 0.63   | 23.54    | 0                        | 2         |
| AKSTQDLSEGISQK-VFDKDGNGYISAAELR-a2-b4                | AKAP79    | Calmodulin | interlink | 177        | 94         | 0.54   | 41.27    | 0                        | 2         |
| AKSTQDLSEGISQK-VFDKDGNGYISAAELR-a2-b4                | AKAP79    | Calmodulin | interlink | 177        | 94         | 0      | 37.82    | 0                        | 2         |
| KRSESSK-VFDKDGNGYISAAELR-a1-b4                       | AKAP79    | Calmodulin | interlink | 90         | 94         | 0      | 36.37    | 0                        | 4         |
| KRSESSKQKPLEGEMQPAINAEDADLSK-VFDKDGNGYISAAELR-a1-b4  | AKAP79    | Calmodulin | interlink | 90         | 94         | 0.75   | 34.46    | 0                        | 4         |
| KRSESSK-VFDKDGNGYISAAELR-a1-b4                       | AKAP79    | Calmodulin | interlink | 90         | 94         | 0      | 34.02    | 0                        | 4         |
| KRSESSK-VFDKDGNGYISAAELR-a1-b4                       | AKAP79    | Calmodulin | interlink | 90         | 94         | 0      | 32.45    | 0                        | 4         |
| SESSKQKPLEGEMQPAINAEDADLSK-VFDKDGNGYISAAELR-a5-b4    | AKAP79    | Calmodulin | interlink | 96         | 94         | 0.77   | 31.7     | 0                        | 7         |
| RSESSKQKPLEGEMQPAINAEDADLSK-VFDKDGNGYISAAELR-a6-b4   | AKAP79    | Calmodulin | interlink | 96         | 94         | 0.22   | 30.77    | 0                        | 7         |
| RSESSKQKPLEGEMQPAINAEDADLSK-VFDKDGNGYISAAELR-a6-b4   | AKAP79    | Calmodulin | interlink | 96         | 94         | 0.57   | 28.89    | 0                        | 7         |
| SESSKQKPLEGEMQPAINAEDADLSK-VFDKDGNGYISAAELR-a5-b4    | AKAP79    | Calmodulin | interlink | 96         | 94         | 0.21   | 28.36    | 0                        | 7         |
| SESSKQKPLEGEMQPAINAEDADLSK-VFDKDGNGYISAAELR-a5-b4    | AKAP79    | Calmodulin | interlink | 96         | 94         | 0      | 28.87    | 0                        | 7         |
| RSESSKQKPLEGEMQPAINAEDADLSK-VFDKDGNGYISAAELR-a6-b4   | AKAP79    | Calmodulin | interlink | 96         | 94         | 0      | 27.45    | 0                        | 7         |
| KRSESSKQKPLEGEMQPAINAEDADLSK-VFDKDGNGYISAAELR-a7-b4  | AKAP79    | Calmodulin | interlink | 96         | 94         | 0.66   | 26.96    | 0                        | 7         |
| SESSKQKPLEGEMQPAINAEDADLSK-VFDKDGNGYISAAELR-a8-b4    | AKAP79    | Calmodulin | interlink | 99         | 94         | 0.7    | 39.34    | 0                        | 16        |
| SESSKQKPLEGEMQPAINAEDADLSK-VFDKDGNGYISAAELR-a8-b4    | AKAP79    | Calmodulin | interlink | 99         | 94         | 0.49   | 35.29    | 0                        | 16        |
| QQKPLEGEMQPAINAEDADLSK-VFDKDGNGYISAAELR-a3-b4        | AKAP79    | Calmodulin | interlink | 99         | 94         | 0.59   | 32.22    | 0                        | 16        |
| SESSKQKPLEGEMQPAINAEDADLSK-VFDKDGNGYISAAELR-a8-b4    | AKAP79    | Calmodulin | interlink | 99         | 94         | 0.71   | 40.16    | 0                        | 16        |
| RSESSKQKPLEGEMQPAINAEDADLSK-VFDKDGNGYISAAELR-a9-b4   | AKAP79    | Calmodulin | interlink | 99         | 94         | 0      | 36.95    | 0                        | 16        |
| SESSKQKPLEGEMQPAINAEDADLSK-VFDKDGNGYISAAELR-a8-b4    | AKAP79    | Calmodulin | interlink | 99         | 94         | 0.68   | 36.18    | 0                        | 16        |
| QQKPLEGEMQPAINAEDADLSK-VFDKDGNGYISAAELR-a3-b4        | AKAP79    | Calmodulin | interlink | 99         | 94         | 0      | 29.09    | 0                        | 16        |
| KRSESSKQKPLEGEMQPAINAEDADLSK-VFDKDGNGYISAAELR-a10-b4 | AKAP79    | Calmodulin | interlink | 99         | 94         | 0.64   | 26.25    | 0                        | 16        |
| SESSKQKPLEGEMQPAINAEDADLSK-VFDKDGNGYISAAELR-a8-b4    | AKAP79    | Calmodulin | interlink | 99         | 94         | 0.48   | 51.49    | 0                        | 16        |
| SESSKQKPLEGEMQPAINAEDADLSK-VFDKDGNGYISAAELR-a8-b4    | AKAP79    | Calmodulin | interlink | 99         | 94         | 0.73   | 34.2     | 0                        | 16        |
| QQKPLEGEMQPAINAEDADLSK-VFDKDGNGYISAAELR-a3-b4        | AKAP79    | Calmodulin | interlink | 99         | 94         | 0.58   | 32.98    | 0                        | 16        |
| RSESSKQKPLEGEMQPAINAEDADLSK-VFDKDGNGYISAAELR-a9-b4   | AKAP79    | Calmodulin | interlink | 99         | 94         | 0      | 32.18    | 0                        | 16        |
| KRSESSKQKPLEGEMQPAINAEDADLSK-VFDKDGNGYISAAELR-a10-b4 | AKAP79    | Calmodulin | interlink | 99         | 94         | 0.52   | 30.04    | 0                        | 16        |
| QQKPLEGEMQPAINAEDADLSK-VFDKDGNGYISAAELR-a3-b4        | AKAP79    | Calmodulin | interlink | 99         | 94         | 0      | 29.99    | 0                        | 16        |
| SESSKQKPLEGEMQPAINAEDADLSK-EAFSLFDKDGDTITTK-a5-b8    | AKAP79    | Calmodulin | interlink | 96         | 21         | 0      | 27.14    | 0.042                    | 1         |
| QQKPLEGEMQPAINAEDADLSK-VFDKDGNGYISAAELR-a3-b4        | AKAP79    | Calmodulin | interlink | 99         | 94         | 0.62   | 26.53    | 0.042                    | 16        |
| RSESSKQKPLEGEMQPAINAEDADLSK-VFDKDGNGYISAAELR-a9-b4   | AKAP79    | Calmodulin | interlink | 99         | 94         | 0.53   | 25.01    | 0.042                    | 16        |

**INTRALINKS**  
Sequence

| Sequence                                          | Protein 1 | Protein 2 | Type      | Position 1 | Position 2 | deltaS | Id-Score | False discovery rate (%) |
|---------------------------------------------------|-----------|-----------|-----------|------------|------------|--------|----------|--------------------------|
| ALPKPAGSEAADVAR-AKSTQDLSEGISQK-a5-b2              | AKAP79    | AKAP79    | intralink | 50         | 177        | 0.42   | 44.06    | 0                        |
| ALPKPAGSEAADVAR-KKAAK-a5-b2                       | AKAP79    | AKAP79    | intralink | 50         | 42         | 0.42   | 43.4     | 0                        |
| ALPKPAGSEAADVAR-ALPKP-a5-b3                       | AKAP79    | AKAP79    | intralink | 50         | 48         | 0.37   | 43.08    | 0                        |
| SKSEESK-SKNVVK-a2-b2                              | AKAP79    | AKAP79    | intralink | 328        | 356        | 0.68   | 41.85    | 0                        |
| ALPKPAGSEAADVAR-AAKALPKP-a5-b3                    | AKAP79    | AKAP79    | intralink | 50         | 45         | 0.8    | 41.29    | 0                        |
| ALPKPAGSEAADVAR-GAWASLKR-a5-b7                    | AKAP79    | AKAP79    | intralink | 50         | 83         | 0.55   | 40.83    | 0                        |
| SKSEESK-SKNVVK-a2-b2                              | AKAP79    | AKAP79    | intralink | 328        | 356        | 0      | 39.63    | 0                        |
| AAKALPKPAGSEAADVAR-ALPKP-a8-b3                    | AKAP79    | AKAP79    | intralink | 50         | 48         | 0.94   | 39.23    | 0                        |
| SKSEESK-SKNVVK-a7-b2                              | AKAP79    | AKAP79    | intralink | 333        | 356        | 0      | 38.39    | 0                        |
| ALPKPAGSEAADVAR-KRSESSK-a5-b1                     | AKAP79    | AKAP79    | intralink | 50         | 90         | 0      | 38.08    | 0                        |
| AAKALPKP-SKNVVK-a3-b2                             | AKAP79    | AKAP79    | intralink | 45         | 356        | 0      | 37.78    | 0                        |
| AKSTQDLSEGISQK-ALPKP-a2-b3                        | AKAP79    | AKAP79    | intralink | 177        | 48         | 0.18   | 37.73    | 0                        |
| AAKALPKP-ALPKP-a3-b3                              | AKAP79    | AKAP79    | intralink | 45         | 48         | 0      | 37.69    | 0                        |
| AKSTQDLSEGISQK-KKAAK-a2-b2                        | AKAP79    | AKAP79    | intralink | 177        | 42         | 0.21   | 37.5     | 0                        |
| AKSTQDLSEGISQK-KKAAK-a2-b1                        | AKAP79    | AKAP79    | intralink | 177        | 41         | 0.42   | 37.46    | 0                        |
| ALPKPAGSEAADVAR-KKAAK-a5-b1                       | AKAP79    | AKAP79    | intralink | 50         | 41         | 0.63   | 37.34    | 0                        |
| ALPKPAGSEAADVAR-SKSEESK-a5-b7                     | AKAP79    | AKAP79    | intralink | 50         | 333        | 0      | 37.26    | 0                        |
| SESSKQKPLEGEMQPAINAEDADLSK-GAWASLKR-a5-b7         | AKAP79    | AKAP79    | intralink | 96         | 83         | 0.81   | 37.19    | 0                        |
| ALPKPAGSEAADVAR-SKNVVK-a5-b2                      | AKAP79    | AKAP79    | intralink | 50         | 356        | 0.31   | 37.14    | 0                        |
| AKSTQDLSEGISQK-KAKSR-a2-b3                        | AKAP79    | AKAP79    | intralink | 177        | 122        | 0.36   | 36.76    | 0                        |
| AAKALPKP-GAWASLKR-a3-b7                           | AKAP79    | AKAP79    | intralink | 45         | 83         | 0.53   | 36.58    | 0                        |
| GAWASLKR-ALPKP-a7-b3                              | AKAP79    | AKAP79    | intralink | 83         | 48         | 0      | 36.54    | 0                        |
| GAWASLKR-GAWASLKR-a7-b7                           | AKAP79    | AKAP79    | intralink | 83         | 83         | 0.31   | 36.02    | 0                        |
| MEPIAIITDTEISEFDVTKSK-SKSEESK-a20-b7              | AKAP79    | AKAP79    | intralink | 354        | 333        | 0.51   | 35.75    | 0                        |
| SESSKQKPLEGEMQPAINAEDADLSK-GAWASLKR-a5-b7         | AKAP79    | AKAP79    | intralink | 96         | 83         | 0      | 35.63    | 0                        |
| GAWASLKR-KKAAK-a7-b2                              | AKAP79    | AKAP79    | intralink | 83         | 42         | 0      | 35.6     | 0                        |
| SEESK-SKNVVK-a5-b2                                | AKAP79    | AKAP79    | intralink | 333        | 356        | 0      | 35.3     | 0                        |
| QKPLEGEMQPAINAEDADLSK-KRSESSK-a3-b1               | AKAP79    | AKAP79    | intralink | 99         | 90         | 0.21   | 34.91    | 0                        |
| GAWASLKR-KRSESSK-a7-b1                            | AKAP79    | AKAP79    | intralink | 83         | 90         | 0      | 34.65    | 0                        |
| SESSKQKPLEGEMQPAINAEDADLSK-AKSTQDLSEGISQK-a8-b2   | AKAP79    | AKAP79    | intralink | 99         | 177        | 0.7    | 34.58    | 0                        |
| QKPLEGEMQPAINAEDADLSK-KAKSR-a22-b3                | AKAP79    | AKAP79    | intralink | 118        | 122        | 0.25   | 34.5     | 0                        |
| QKPLEGEMQPAINAEDADLSK-KAKSR-a22-b1                | AKAP79    | AKAP79    | intralink | 118        | 120        | 0.27   | 34.4     | 0                        |
| DTLSQESDFKENGITEEK-SKSEESK-a11-b2                 | AKAP79    | AKAP79    | intralink | 318        | 328        | 0      | 33.96    | 0                        |
| ALPKPAGSEAADVAR-KKAAK-a5-b2                       | AKAP79    | AKAP79    | intralink | 50         | 44         | 0.38   | 34.2     | 0                        |
| ALPKPAGSEAADVAR-GAWASLKR-a5-b7                    | AKAP79    | AKAP79    | intralink | 50         | 85         | 0.57   | 34.25    | 0                        |
| ALPKPAGSEAADVAR-GAWASLKR-a3-b7                    | AKAP79    | AKAP79    | intralink | 48         | 85         | 0      | 34.28    | 0                        |
| ALPKPAGSEAADVAR-AKSTQDLSEGISQK-a5-b2              | AKAP79    | AKAP79    | intralink | 50         | 179        | 0.46   | 34.27    | 0                        |
| ALPKPAGSEAADVAR-ALPKP-a5-b3                       | AKAP79    | AKAP79    | intralink | 50         | 50         | 0      | 41.06    | 0                        |
| DTLSQESDFKENGITEEK-SKSEESK-a11-b7                 | AKAP79    | AKAP79    | intralink | 318        | 335        | 0.84   | 38.54    | 0                        |
| DTLSQESDFKENGITEEK-SKSEESK-a19-b5                 | AKAP79    | AKAP79    | intralink | 326        | 335        | 0      | 38.29    | 0                        |
| DTLSQESDFKENGITEEK-SKSEESK-a11-b5                 | AKAP79    | AKAP79    | intralink | 318        | 335        | 0      | 36.24    | 0                        |
| ALPKPAGSEAADVAR-AKSTQDLSEGISQK-a3-b2              | AKAP79    | AKAP79    | intralink | 48         | 179        | 0.36   | 36.08    | 0                        |
| DTLSQESDFKENGITEEK-SKSEESK-a11-b5                 | AKAP79    | AKAP79    | intralink | 318        | 335        | 0      | 34.67    | 0                        |
| ALPKPAGSEAADVAR-ALPKPAGSEAADVAR-a5-b5             | AKAP79    | AKAP79    | intralink | 50         | 52         | 0      | 34.1     | 0                        |
| SKNVKQFLISAENEQVGVFANDNGFEDR-SKSEESK-a6-b2        | AKAP79    | AKAP79    | intralink | 360        | 330        | 0      | 33.87    | 0                        |
| NVPKQFLISAENEQVGVFANDNGFEDR-SKSEESK-a4-b7         | AKAP79    | AKAP79    | intralink | 360        | 335        | 0      | 33.11    | 0                        |
| QKPLEGEMQPAINAEDADLSK-RKRSESSK-a3-b2              | AKAP79    | AKAP79    | intralink | 99         | 92         | 0      | 32.93    | 0                        |
| ALPKPAGSEAADVAR-KAKSR-a5-b1                       | AKAP79    | AKAP79    | intralink | 50         | 122        | 0      | 32.2     | 0                        |
| SESSKQKPLEGEMQPAINAEDADLSK-KAKSR-a27-b3           | AKAP79    | AKAP79    | intralink | 118        | 124        | 0.56   | 32.16    | 0                        |
| AKSTQDLSEGISQK-ALPKP-a2-b3                        | AKAP79    | AKAP79    | intralink | 177        | 50         | 0      | 32.04    | 0                        |
| ALPKPAGSEAADVAR-AAKALPKP-a5-b3                    | AKAP79    | AKAP79    | intralink | 50         | 47         | 0.78   | 30.98    | 0                        |
| QKPLEGEMQPAINAEDADLSK-RKRSESSK-a3-b2              | AKAP79    | AKAP79    | intralink | 99         | 92         | 0      | 30.36    | 0                        |
| SESSKQKPLEGEMQPAINAEDADLSK-ALPKPAGSEAADVAR-a5-b5  | AKAP79    | AKAP79    | intralink | 96         | 52         | 0.17   | 29.77    | 0                        |
| SESSKQKPLEGEMQPAINAEDADLSK-GAWASLKR-a5-b7         | AKAP79    | AKAP79    | intralink | 96         | 85         | 0      | 28.8     | 0                        |
| SESSKQKPLEGEMQPAINAEDADLSK-ALPKPAGSEAADVAR-a5-b3  | AKAP79    | AKAP79    | intralink | 96         | 50         | 0.19   | 28.7     | 0                        |
| QKPLEGEMQPAINAEDADLSK-SKSEESK-a3-b7               | AKAP79    | AKAP79    | intralink | 99         | 335        | 0.44   | 27.47    | 0                        |
| QKPLEGEMQPAINAEDADLSK-SKSEESK-a3-b2               | AKAP79    | AKAP79    | intralink | 99         | 330        | 0.52   | 26.98    | 0                        |
| NVPKQFLISAENEQVGVFANDNGFEDR-SKSEESK-a4-b2         | AKAP79    | AKAP79    | intralink | 360        | 330        | 0      | 26.92    | 0                        |
| DTLSQESDFKENGITEEK-SKSEESK-a11-b2                 | AKAP79    | AKAP79    | intralink | 318        | 330        | 0      | 26.61    | 0                        |
| ALPKPAGSEAADVAR-KRSESSK-a5-b1                     | AKAP79    | AKAP79    | intralink | 50         | 92         | 0.38   | 26.29    | 0                        |
| QKPLEGEMQPAINAEDADLSK-QKPLEGEMQPAINAEDADLSK-a3-b3 | AKAP79    | AKAP79    | intralink | 99         | 101        | 0      | 26.18    | 0                        |
| SESSKQKPLEGEMQPAINAEDADLSK-KKAKSR-a8-b2           | AKAP79    | AKAP79    | intralink | 99         | 122        | 0      | 25.46    | 0                        |
| AKSTQDLSEGISQK-KRSESSK-a2-b1                      | AKAP79    | AKAP79    | intralink | 177        | 92         | 0      | 25.36    | 0                        |
| DYESTEIVAEETPKPDTLSQESDFKENGITEEK-SKSEESK-a26-b2  | AKAP79    | AKAP79    | intralink | 318        | 330        | 0      | 24.6     | 0                        |
| QKPLEGEMQPAINAEDADLSK-KRSESSK-a3-b1               | AKAP79    | AKAP79    | intralink | 99         | 92         | 0.24   | 23.98    | 0                        |
| DYESTEIVAEETPKPDTLSQESDFKENGITEEK-SKSEESK-a26-b7  | AKAP79    | AKAP79    | intralink | 318        | 335        | 0      | 23.09    | 0                        |
| QKPLEGEMQPAINAEDADLSK-KAKSR-a22-b1                | AKAP79    | AKAP79    | intralink | 118        | 122        | 0.37   | 22.45    | 0                        |
| DYESTEIVAEETPKPDTLSQESDFKENGITEEK-SKSEESK-a13-b2  | AKAP79    | AKAP79    | intralink | 305        | 330        | 0      | 21.47    | 0                        |
| RSESSKQKPLEGEMQPAINAEDADLSK-KKAKSR-a6-b1          | AKAP79    | AKAP79    | intralink | 96         | 121        | 0      | 19.51    | 0                        |
| QKPLEGEMQPAINAEDADLSK-KAKSR-a22-b3                | AKAP79    | AKAP79    | intralink | 118        | 124        | 0.6    | 19.32    | 0                        |
| SESSKQKPLEGEMQPAINAEDADLSK-GAWASLKR-a8-b7         | AKAP79    | AKAP79    | intralink | 99         | 85         | 0.83   | 41.33    | 0                        |
| ALPKPAGSEAADVAR-KKAAK-a5-b2                       | AKAP79    | AKAP79    | intralink | 50         | 44         | 0.46   | 40.96    | 0                        |
| ALPKPAGSEAADVAR-AKSTQDLSEGISQK-a5-b2              | AKAP79    | AKAP79    | intralink | 50         | 179        | 0.52   | 40.55    | 0                        |
| ALPKPAGSEAADVAR-GAWASLKR-a3-b7                    | AKAP79    | AKAP79    | intralink | 48         | 85         | 0      | 39.71    | 0                        |
| SESSKQKPLEGEMQPAINAEDADLSK-GAWASLKR-a5-b7         | AKAP79    | AKAP79    | intralink | 96         | 85         | 0.57   | 37.61    | 0                        |
| ALPKPAGSEAADVAR-ALPKP-a5-b3                       | AKAP79    | AKAP79    | intralink | 50         | 50         | 0      | 36.64    | 0                        |
| QKPLEGEMQPAINAEDADLSK-RKRSESSK-a3-b2              | AKAP79    | AKAP79    | intralink | 99         | 92         | 0      | 36.43    | 0                        |
| ALPKPAGSEAADVAR-KKAAK-a5-b1                       | AKAP79    | AKAP79    | intralink | 50         | 43         | 0.32   | 35.77    | 0                        |
| DTLSQESDFKENGITEEK-SEESK-a11-b5                   | AKAP79    | AKAP79    | intralink | 318        | 335        | 0      | 35.77    | 0                        |
| SKNVKQFLISAENEQVGVFANDNGFEDR-SKSEESK-a6-b2        | AKAP79    | AKAP79    | intralink | 360        | 330        | 0      | 34.36    | 0                        |
| DTLSQESDFKENGITEEK-SKSEESK-a11-b5                 | AKAP79    | AKAP79    | intralink | 318        | 335        | 0.87   | 33.75    | 0                        |
| AKSTQDLSEGISQK-ALPKP-a2-b3                        | AKAP79    | AKAP79    | intralink | 177        | 50         | 0.44   | 33.27    | 0                        |
| SESSKQKPLEGEMQPAINAEDADLSK-ALPKPAGSEAADVAR-a5-b3  | AKAP79    | AKAP79    | intralink | 96         | 50         | 0      | 32.59    | 0                        |
| QKPLEGEMQPAINAEDADLSK-RKRSESSK-a3-b2              | AKAP79    | AKAP79    | intralink | 99         | 92         | 0.25   | 31.83    | 0                        |
| DTLSQESDFKENGITEEK-SKSEESK-a19-b5                 | AKAP79    | AKAP79    | intralink | 326        | 335        | 0.78   | 31.51    | 0                        |
| SESSKQKPLEGEMQPAINAEDADLSK-ALPKP-a8-b3            | AKAP79    | AKAP79    | intralink | 99         | 50         | 0.34   | 31.42    | 0                        |
| ALPKPAGSEAADVAR-RKAAK-a5-b3                       | AKAP79    | AKAP79    | intralink | 50         | 44         | 0.36   | 31.1     | 0                        |
| QKPLEGEMQPAINAEDADLSK-KRSESSK-a3-b1               | AKAP79    | AKAP79    | intralink | 99         | 92         | 0.91   | 31.07    | 0                        |
| ALPKPAGSEAADVAR-KAKSR-a3-b1                       | AKAP79    | AKAP79    | intralink | 48         | 122        | 0      | 30.68    | 0                        |



|                                                   |            |            |           |     |     |      |       |       |
|---------------------------------------------------|------------|------------|-----------|-----|-----|------|-------|-------|
| SESSKQKPLEGEMQPAINAEDADLSK-GAWASLKR-a5-b7         | AKAP79     | AKAP79     | intralink | 96  | 85  | 0    | 30.32 | 0     |
| QKQKPLEGEMQPAINAEDADLSK-KAKSR-a22-b3              | AKAP79     | AKAP79     | intralink | 118 | 124 | 0.36 | 28.8  | 0     |
| ALKPKAGSEAADVAR-ALKPKAGSEAADVAR-a5-b5             | AKAP79     | AKAP79     | intralink | 50  | 52  | 0    | 28.7  | 0     |
| ALKPKAGSEAADVAR-KAKSR-a5-b1                       | AKAP79     | AKAP79     | intralink | 50  | 122 | 0    | 28.55 | 0     |
| SESSKQKPLEGEMQPAINAEDADLSK-KAKSR-a27-b3           | AKAP79     | AKAP79     | intralink | 118 | 124 | 0.4  | 28.23 | 0     |
| ALKPKAGSEAADVAR-KAKSR-a5-b3                       | AKAP79     | AKAP79     | intralink | 50  | 124 | 0    | 27.56 | 0     |
| SKNVPKQFLISAENEQVGFANDNGFEDR-SKSEESKR-a2-b2       | AKAP79     | AKAP79     | intralink | 356 | 328 | 0.28 | 33.89 | 0.014 |
| AKSTQDLSSEGISQK-AAKALKPK-a2-b3                    | AKAP79     | AKAP79     | intralink | 177 | 45  | 0    | 33.66 | 0.014 |
| ALKPKAGSEAADVAR-KKAAK-a5-b2                       | AKAP79     | AKAP79     | intralink | 50  | 42  | 0.5  | 33.59 | 0.014 |
| DTELSQESDFKENGITEEK-SEESKR-a11-b5                 | AKAP79     | AKAP79     | intralink | 318 | 333 | 0    | 33.24 | 0.014 |
| SESSKQKPLEGEMQPAINAEDADLSK-GAWASLKR-a8-b7         | AKAP79     | AKAP79     | intralink | 99  | 83  | 0.2  | 32.79 | 0.014 |
| QKQKPLEGEMQPAINAEDADLSK-ALKPK-a3-b3               | AKAP79     | AKAP79     | intralink | 99  | 48  | 0.21 | 32.61 | 0.014 |
| GAWASLKR-KAKSR-a7-b3                              | AKAP79     | AKAP79     | intralink | 83  | 122 | 0.58 | 32.54 | 0.014 |
| ALKPKAGSEAADVAR-ALKPKAGSEAADVAR-a5-b5             | AKAP79     | AKAP79     | intralink | 50  | 50  | 0    | 32.33 | 0.014 |
| DTELSQESDFKENGITEEK-SKSEESKR-a11-b5               | AKAP79     | AKAP79     | intralink | 318 | 333 | 0.85 | 32.22 | 0.014 |
| DTELSQESDFKENGITEEK-SKSEESKR-a19-b5               | AKAP79     | AKAP79     | intralink | 326 | 333 | 0.23 | 31.37 | 0.014 |
| GAWASLKR-SKNVPK-a7-b2                             | AKAP79     | AKAP79     | intralink | 83  | 356 | 0.15 | 31.13 | 0.014 |
| SESSKQKPLEGEMQPAINAEDADLSK-ALKPK-a8-b3            | AKAP79     | AKAP79     | intralink | 99  | 48  | 0.38 | 30.94 | 0.014 |
| SESSKQKPLEGEMQPAINAEDADLSK-GAWASLKR-a8-b7         | AKAP79     | AKAP79     | intralink | 99  | 83  | 0    | 30.92 | 0.014 |
| SKNVPKQFLISAENEQVGFANDNGFEDR-SKSEESKR-a6-b2       | AKAP79     | AKAP79     | intralink | 360 | 328 | 0.16 | 30.83 | 0.014 |
| ALKPKAGSEAADVAR-GAWASLKR-a3-b7                    | AKAP79     | AKAP79     | intralink | 48  | 83  | 0    | 30.68 | 0.014 |
| ALKPK-KKAAK-a3-b2                                 | AKAP79     | AKAP79     | intralink | 48  | 42  | 0    | 30.63 | 0.014 |
| VQEEAEILDITQTPLNDQATKAK-AAKALKPK-a22-b3           | AKAP79     | AKAP79     | intralink | 175 | 45  | 0    | 30.29 | 0.014 |
| ENGITEEK-SKSEESKR-a8-b5                           | AKAP79     | AKAP79     | intralink | 326 | 333 | 0.48 | 30.18 | 0.014 |
| SKSEESKR-ALKPK-a7-b3                              | AKAP79     | AKAP79     | intralink | 333 | 48  | 0    | 29.99 | 0.014 |
| ALKPKAGSEAADVAR-KAKSR-a5-b1                       | AKAP79     | AKAP79     | intralink | 50  | 120 | 0.36 | 29.83 | 0.014 |
| ALKPKAGSEAADVAR-KAKSR-a5-b3                       | AKAP79     | AKAP79     | intralink | 50  | 122 | 0.19 | 29.82 | 0.014 |
| VQEEAEILDITQTPLNDQATKAK-ALKPKAGSEAADVAR-a22-b5    | AKAP79     | AKAP79     | intralink | 175 | 50  | 0.24 | 29.49 | 0.014 |
| SESSKQKPLEGEMQPAINAEDADLSK-ALKPKAGSEAADVAR-a8-b3  | AKAP79     | AKAP79     | intralink | 99  | 48  | 0    | 28.32 | 0.014 |
| DTELSQESDFKENGITEEK-SKSEESKR-a11-b2               | AKAP79     | AKAP79     | intralink | 318 | 328 | 0    | 28.21 | 0.014 |
| ALKPK-ALKPK-a3-b3                                 | AKAP79     | AKAP79     | intralink | 48  | 48  | 0    | 27.43 | 0.014 |
| SAEGSPGAERQKEK-AAKALKPK-a12-b3                    | AKAP79     | AKAP79     | intralink | 29  | 45  | 0.4  | 27.18 | 0.014 |
| SESSKQKPLEGEMQPAINAEDADLSK-ALKPKAGSEAADVAR-a5-b3  | AKAP79     | AKAP79     | intralink | 96  | 48  | 0    | 27.18 | 0.014 |
| SESSKQKPLEGEMQPAINAEDADLSK-ALKPK-a5-b3            | AKAP79     | AKAP79     | intralink | 96  | 48  | 0    | 27.05 | 0.014 |
| SESSKQKPLEGEMQPAINAEDADLSK-KAKSR-a27-b1           | AKAP79     | AKAP79     | intralink | 118 | 120 | 0.22 | 26.98 | 0.014 |
| ALKPK-KKAAK-a3-b1                                 | AKAP79     | AKAP79     | intralink | 48  | 41  | 0    | 26.74 | 0.014 |
| DYESTEIVAEETPKKDTLSQESDFKENGITEEK-SKSEESKR-a26-b7 | AKAP79     | AKAP79     | intralink | 318 | 333 | 0    | 26.55 | 0.014 |
| QKQKPLEGEMQPAINAEDADLSK-KRSESSK-a3-b1             | AKAP79     | AKAP79     | intralink | 99  | 90  | 0.3  | 26.45 | 0.014 |
| ALKPKAGSEAADVAR-SAEGSPGAERQKEK-a5-b12             | AKAP79     | AKAP79     | intralink | 50  | 29  | 0.55 | 26.17 | 0.014 |
| DTELSQESDFKENGITEEK-SKSEESKR-a11-b7               | AKAP79     | AKAP79     | intralink | 318 | 333 | 0.8  | 25.42 | 0.014 |
| SKSEESKR-ALKPK-a2-b3                              | AKAP79     | AKAP79     | intralink | 328 | 48  | 0    | 24.74 | 0.014 |
| QKQKPLEGEMQPAINAEDADLSK-KAWASLKR-a23-b7           | AKAP79     | AKAP79     | intralink | 119 | 83  | 0    | 23.91 | 0.014 |
| SESSKQKPLEGEMQPAINAEDADLSK-KKAKSR-a8-b4           | AKAP79     | AKAP79     | intralink | 99  | 124 | 0    | 18.57 | 0.021 |
| QKQKPLEGEMQPAINAEDADLSK-DYESTEIVAEETPKK-a3-b13    | AKAP79     | AKAP79     | intralink | 307 | 307 | 0    | 18.39 | 0.021 |
| DYESTEIVAEETPKKDTLSQESDFKENGITEEK-SKSEESKR-a26-b2 | AKAP79     | AKAP79     | intralink | 318 | 328 | 0.8  | 22.79 | 0.042 |
| SESSKQKPLEGEMQPAINAEDADLSK-KKAKSR-a8-b1           | AKAP79     | AKAP79     | intralink | 99  | 121 | 0    | 17.64 | 0.042 |
| GAWASLKR-SKSEESKR-a7-b7                           | AKAP79     | AKAP79     | intralink | 83  | 333 | 0    | 22.69 | 0.049 |
| QKQKPLEGEMQPAINAEDADLSK-GAWASLKR-a22-b7           | AKAP79     | AKAP79     | intralink | 118 | 83  | 0.84 | 21.52 | 0.049 |
| QKQKPLEGEMQPAINAEDADLSK-KRSESSK-a3-b1             | AKAP79     | AKAP79     | intralink | 99  | 90  | 0    | 20.94 | 0.049 |
| DYESTEIVAEETPKKDTLSQESDFKENGITEEK-SKSEESKR-a26-b2 | AKAP79     | AKAP79     | intralink | 318 | 328 | 0    | 20.71 | 0.049 |
| MHHHHHHMETTISEIHVENKDEKR-SAEGSPGAERQKEK-a20-b12   | AKAP79     | AKAP79     | intralink | 13  | 29  | 0    | 20.37 | 0.049 |
| QKQKPLEGEMQPAINAEDADLSK-KAWASLKR-a22-b7           | AKAP79     | AKAP79     | intralink | 118 | 83  | 0    | 20.31 | 0.049 |
| SESSKQKPLEGEMQPAINAEDADLSK-DYESTEIVAEETPKK-a8-b13 | AKAP79     | AKAP79     | intralink | 99  | 305 | 0.22 | 19.22 | 0.049 |
| QKQKPLEGEMQPAINAEDADLSK-KRSESSK-a3-b1             | AKAP79     | AKAP79     | intralink | 99  | 92  | 0    | 24.46 | 0.053 |
| QKQKPLEGEMQPAINAEDADLSK-GAWASLKR-a3-b7            | AKAP79     | AKAP79     | intralink | 99  | 85  | 0    | 24.34 | 0.053 |
| VQEEAEILDITQTPLNDQATKAK-ALKPKAGSEAADVAR-a22-b5    | AKAP79     | AKAP79     | intralink | 175 | 52  | 0.69 | 24.22 | 0.053 |
| QKQKPLEGEMQPAINAEDADLSK-KAKSR-a22-b1              | AKAP79     | AKAP79     | intralink | 118 | 122 | 0.29 | 23.48 | 0.053 |
| VQEEAEILDITQTPLNDQATKAK-GAWASLKR-a22-b7           | AKAP79     | AKAP79     | intralink | 175 | 85  | 0.56 | 23.46 | 0.053 |
| DYESTEIVAEETPKKDTLSQESDFKENGITEEK-SKSEESKR-a26-b2 | AKAP79     | AKAP79     | intralink | 318 | 330 | 0.93 | 22.36 | 0.053 |
| ALKPKAGSEAADVAR-KRSESSK-a5-b1                     | AKAP79     | AKAP79     | intralink | 50  | 92  | 0    | 21.61 | 0.053 |
| DYESTEIVAEETPKKDTLSQESDFKENGITEEK-SKSEESKR-a26-b7 | AKAP79     | AKAP79     | intralink | 318 | 335 | 0    | 21.25 | 0.053 |
| DTELSQESDFKENGITEEK-SKSEESKR-a11-b2               | AKAP79     | AKAP79     | intralink | 318 | 330 | 0.89 | 21.18 | 0.053 |
| SESSKQKPLEGEMQPAINAEDADLSK-KKAKSR-a8-b4           | AKAP79     | AKAP79     | intralink | 99  | 124 | 0    | 21    | 0.053 |
| DYESTEIVAEETPKKDTLSQESDFKENGITEEK-SKSEESKR-a26-b2 | AKAP79     | AKAP79     | intralink | 318 | 330 | 0.75 | 20.31 | 0.053 |
| HVMTNLGEKLTDEEVDDEMIR-VFDKDGNGYISAAELR-a9-b4      | Calmodulin | Calmodulin | intralink | 115 | 94  | 0.67 | 43.41 | 0     |
| KMKDTSSEEEIREAFR-VFDKDGNGYISAAELR-a3-b4           | Calmodulin | Calmodulin | intralink | 77  | 94  | 0.94 | 41.32 | 0     |
| KMKDTSSEEEIREAFR-VFDKDGNGYISAAELR-a1-b4           | Calmodulin | Calmodulin | intralink | 75  | 94  | 0.89 | 39.07 | 0     |
| EAFRVFDKDGNGYISAAELR-MKDDTSEEEIR-a8-b2            | Calmodulin | Calmodulin | intralink | 77  | 77  | 0.48 | 35.47 | 0     |
| EAFRVFDKDGNGYISAAELR-KMKDTSSEEEIR-a8-b3           | Calmodulin | Calmodulin | intralink | 94  | 77  | 0.94 | 33.77 | 0     |
| EAFRVFDKDGNGYISAAELR-KMKDTSSEEEIR-a8-b1           | Calmodulin | Calmodulin | intralink | 94  | 75  | 0.94 | 31.6  | 0     |
| HVMTNLGEKLTDEEVDDEMIR-KMKDTSSEEEIREAFR-a9-b3      | Calmodulin | Calmodulin | intralink | 115 | 77  | 0    | 26.47 | 0     |
| VFDKDGNGYISAAELR-MKDDTSEEEIREAFR-a4-b2            | Calmodulin | Calmodulin | intralink | 94  | 77  | 0    | 21.71 | 0     |
| KMKDTSSEEEIREAFR-VFDKDGNGYISAAELR-a3-b4           | Calmodulin | Calmodulin | intralink | 77  | 94  | 0.78 | 38.38 | 0     |
| KMKDTSSEEEIREAFR-VFDKDGNGYISAAELR-a1-b4           | Calmodulin | Calmodulin | intralink | 75  | 94  | 0.88 | 37.86 | 0     |
| EAFRVFDKDGNGYISAAELR-MKDDTSEEEIR-a8-b2            | Calmodulin | Calmodulin | intralink | 94  | 75  | 0    | 32.87 | 0.014 |
| EAFRVFDKDGNGYISAAELR-KMKDTSSEEEIR-a8-b3           | Calmodulin | Calmodulin | intralink | 94  | 77  | 0.87 | 32.7  | 0.014 |
| VFDKDGNGYISAAELR-MKDDTSEEEIREAFR-a4-b2            | Calmodulin | Calmodulin | intralink | 94  | 77  | 0.9  | 20.2  | 0.049 |

**Supplementary Table 1. AKAP79-CaM crosslinks identified by XL-MS.** Interlinks and intralinks detected in the crosslinked AKAP79-D/D-CaM sample using XL-MS are listed. Crosslinked peptides were pooled from runs of three biological replicates. deltaS is a measure for how close the best assigned sequence match was scored in regard to the second match. The Id-score is a weighted sum of different measures for assessing the quality of the composite MS2 spectrum calculated by xQuest. FDR denotes the false-discovery rate as calculated by xProphet. Frequency indicates the total number of occasions that a unique crosslink was independently detected within biological replicates.

## Supplementary Table 2

| Rank                                                                                         | PDB ID/Chain | Z Score | R.M.S. Deviation (Å) | Length of Alignment | Length of aligned protein | Identity (%) | Aligned Protein (region)                           | Metal Coordination State                                                                  | Comments                                                                                    |
|----------------------------------------------------------------------------------------------|--------------|---------|----------------------|---------------------|---------------------------|--------------|----------------------------------------------------|-------------------------------------------------------------------------------------------|---------------------------------------------------------------------------------------------|
| <b>Search performed with N-lobe (2-79) of Chain B from CaM - AKAP79 (77-92) structure</b>    |              |         |                      |                     |                           |              |                                                    |                                                                                           |                                                                                             |
| 1                                                                                            | 3gn4-D       | 13.9    | 1                    | 72                  | 145                       | 100          | Calmodulin (N-lobe)                                | Ca <sup>2+</sup> -free conformation with all four EF hands coordinating Mg <sup>2+</sup>  | Myosin-VI complex                                                                           |
| 2                                                                                            | 2pq3-A       | 13.6    | 0.9                  | 69                  | 74                        | 100          | Calmodulin (N-lobe)                                | Zinc-trapped intermediate                                                                 | Crystal contains CaM N-terminus only                                                        |
| 3                                                                                            | 4oy4-A       | 13.2    | 0.9                  | 72                  | 334                       | 100          | Calmodulin (N-lobe)                                | EF hands unoccupied                                                                       | CaM fused within sequence of CaMPARI v0.2 genetically-encoded sensor                        |
| 4                                                                                            | 1cfd-A       | 13.1    | 1.1                  | 72                  | 148                       | 100          | Calmodulin (N-lobe)                                | EF hands unoccupied                                                                       | Solution structure                                                                          |
| 5                                                                                            | 1f70-A       | 13.1    | 0.8                  | 69                  | 76                        | 100          | Calmodulin (N-lobe)                                | EF hands unoccupied                                                                       | N-terminal domain only, solution structure                                                  |
| 6                                                                                            | 1top-A       | 12.9    | 1.1                  | 72                  | 162                       | 68           | Troponin C (N-lobe)                                | N-lobe EF hands are unoccupied, both C-lobe EF hands coordinate Ca <sup>2+</sup>          | Chicken skeletal muscle troponin C                                                          |
| 7                                                                                            | 2ggm-A       | 12.9    | 1.1                  | 72                  | 149                       | 46           | Centrin-2 (N-lobe)                                 | N-lobe EF hands are unoccupied, both C-lobe EF hands coordinate Ca <sup>2+</sup>          | Complex with xeroderma pigmentosum group C protein, only contacts to peptide involve C-lobe |
| 8                                                                                            | 1lkj-A       | 12.6    | 1.4                  | 71                  | 146                       | 62           | Calmodulin (N-lobe)                                | EF hands unoccupied                                                                       | Yeast CaM (solution structure)                                                              |
| 9                                                                                            | 2imv-A       | 12.5    | 1.7                  | 72                  | 147                       | 65           | Calmodulin-related protein 97A (N-lobe)            | N-lobe binds a single Ca <sup>2+</sup> , both C-lobe EF hands coordinate Ca <sup>2+</sup> | Androcam binds myosin VI insert 2 site at all Ca <sup>2+</sup> levels                       |
| 10                                                                                           | 4okh-C       | 11.9    | 1.4                  | 71                  | 147                       | 20           | Calpain-3 (EF3 and EF4)                            | EF3 coordinates Ca <sup>2+</sup> , EF4 is unoccupied                                      | Calpain-3 penta-EF hand domain                                                              |
| 11                                                                                           | 1xfu-O       | 11.9    | 1.5                  | 72                  | 146                       | 100          | Calmodulin (N-lobe)                                | N-lobe closed but binds one Ca <sup>2+</sup> , both C-lobe EF hands bind Ca <sup>2+</sup> | Anthrax edema factor (EF) complex                                                           |
| 12                                                                                           | 1dmo-A       | 11.8    | 1.7                  | 71                  | 148                       | 100          | Calmodulin (N-lobe)                                | EF hands unoccupied                                                                       | Solution structure                                                                          |
| 13                                                                                           | 3fwc-E       | 11.7    | 1.7                  | 72                  | 150                       | 36           | Cell division control protein 31 (N-lobe)          | EF hands unoccupied                                                                       | Within the Sac3:Sus1:Cdc31 complex                                                          |
| 14                                                                                           | 2ekw-C       | 11.2    | 1.5                  | 69                  | 156                       | 33           | Myosin catalytic light chain LC-1 (N-lobe)         | EF1 coordinates Ca <sup>2+</sup> , EF hands 2-4 are unoccupied                            | Squid myosin S1 complex                                                                     |
| 15                                                                                           | 1juo-B       | 11.2    | 1.2                  | 70                  | 172                       | 19           | Sorcin (EF3 and EF4)                               | EF hands unoccupied                                                                       | Penta-EF-Hand protein                                                                       |
| 16                                                                                           | 1kfu-L       | 10.9    | 0.9                  | 70                  | 699                       | 19           | M-calpain small subunit (EF3 and EF4)              | EF hands unoccupied                                                                       | m-Calpain Form II complex                                                                   |
| 17                                                                                           | 2bl0-B       | 10.8    | 1.1                  | 63                  | 145                       | 38           | Myosin regulatory light chain (N-lobe)             | EF1 coordinates Ca <sup>2+</sup> , EF hands 2-4 are unoccupied                            | Myosin II complex                                                                           |
| 18                                                                                           | 1w7i-B       | 10.7    | 2                    | 72                  | 145                       | 44           | Myosin LC-1, slow twitch muscle A isoform (N-lobe) | EF hands unoccupied                                                                       | Myosin V complex                                                                            |
| 19                                                                                           | 1f54-A       | 10.7    | 1.4                  | 69                  | 77                        | 62           | Calmodulin (N-lobe)                                | EF hands unoccupied                                                                       | N-terminus only, solution structure of yeast CaM                                            |
| 20                                                                                           | 1br1-F       | 10.6    | 1.9                  | 70                  | 148                       | 51           | Myosin light polypeptide 6 (N-lobe)                | EF hands unoccupied                                                                       | Myosin XI complex                                                                           |
| <b>Search performed with C-lobe (80-147) of Chain B from CaM - AKAP79 (77-92) structure</b>  |              |         |                      |                     |                           |              |                                                    |                                                                                           |                                                                                             |
| 1                                                                                            | 3sg6-A       | 14.6    | 0.5                  | 66                  | 383                       | 100          | Calmodulin (C-lobe)                                | Fully occupied (4Ca <sup>2+</sup> )                                                       | CaM fused within sequence of GCaMP2-LIA                                                     |
| 2                                                                                            | 4q5u-A       | 14.5    | 0.5                  | 67                  | 145                       | 100          | Calmodulin (C-lobe)                                | Fully occupied (4Ca <sup>2+</sup> )                                                       | CaM bound to its recognition site from calcineurin (1:1 conformation)                       |
| 3                                                                                            | 3u0k-A       | 14.4    | 0.6                  | 65                  | 397                       | 100          | Calmodulin (C-lobe)                                | Fully occupied (4Ca <sup>2+</sup> )                                                       | CaM fused within sequence of RCaMP                                                          |
| 4                                                                                            | 1mxe-B       | 14.4    | 0.7                  | 67                  | 144                       | 96           | Calmodulin (C-lobe)                                | Fully occupied (4Ca <sup>2+</sup> )                                                       | <i>Drosophila</i> CaM bound to target sequence of CaM-dependent protein kinase I            |
| 5                                                                                            | 3oxq-C       | 14.4    | 0.7                  | 67                  | 145                       | 100          | Calmodulin (C-lobe)                                | Fully occupied (4Ca <sup>2+</sup> )                                                       | Match is to CaM bound to Cav1.2 IQ domain sequence                                          |
| 6                                                                                            | 3cln-A       | 14.4    | 0.7                  | 67                  | 143                       | 99           | Calmodulin (C-lobe)                                | Fully occupied (4Ca <sup>2+</sup> )                                                       | First high-resolution structure of Ca <sup>2+</sup> -CaM                                    |
| 7                                                                                            | 3ek7-A       | 14.2    | 0.5                  | 66                  | 389                       | 100          | Calmodulin (C-lobe)                                | Fully occupied (4Ca <sup>2+</sup> )                                                       | CaM fused within sequence of GCaMP2                                                         |
| 8                                                                                            | 2vay-A       | 14.2    | 0.7                  | 67                  | 146                       | 100          | Calmodulin (C-lobe)                                | Fully occupied (4Ca <sup>2+</sup> )                                                       | CaM bound to Cav1.1 IQ domain                                                               |
| 9                                                                                            | 3dvc-A       | 14.2    | 0.7                  | 67                  | 143                       | 100          | Calmodulin (C-lobe)                                | Fully occupied (4Ca <sup>2+</sup> )                                                       | CaM bound to Cav2.3 IQ domain                                                               |
| 10                                                                                           | 4zlk-B       | 14.2    | 0.6                  | 66                  | 133                       | 100          | Calmodulin (C-lobe)                                | Fully occupied (4Ca <sup>2+</sup> )                                                       | CaM bound to Myosin VA                                                                      |
| 11                                                                                           | 2be6-C       | 14.2    | 0.5                  | 65                  | 136                       | 100          | Calmodulin (C-lobe)                                | Fully occupied (4Ca <sup>2+</sup> )                                                       | CaM bound to Cav1.2 IQ domain                                                               |
| 12                                                                                           | 4agr-A       | 14.1    | 0.6                  | 67                  | 145                       | 87           | Calmodulin-7 (C-lobe)                              | Fully occupied (4Ca <sup>2+</sup> )                                                       | In complex with the regulatory domain of a plasma-membrane Ca <sup>2+</sup> -ATPase         |
| 13                                                                                           | 3sjq-A       | 14.1    | 0.6                  | 67                  | 147                       | 100          | Calmodulin (C-lobe)                                | Fully occupied (4Ca <sup>2+</sup> )                                                       | Bound to small conductance potassium channel splice variant (2:2 conformation)              |
| 14                                                                                           | 3wic-A       | 14      | 0.6                  | 66                  | 392                       | 97           | Calmodulin (C-lobe)                                | Fully occupied (4Ca <sup>2+</sup> )                                                       | CaM fused within sequence of GCaMP6m                                                        |
| 15                                                                                           | 1niw-G       | 14      | 0.9                  | 67                  | 145                       | 94           | Calmodulin (C-lobe)                                | Fully occupied (4Ca <sup>2+</sup> )                                                       | CaM bound to its recognition site in endothelial nitric oxide synthase                      |
| 16                                                                                           | 2lv6-A       | 14      | 0.7                  | 67                  | 148                       | 97           | Calmodulin (C-lobe)                                | Fully occupied (4Ca <sup>2+</sup> )                                                       | CaM bound to skeletal muscle myosin light chain kinase                                      |
| 17                                                                                           | 4ehq-A       | 14      | 0.7                  | 66                  | 145                       | 100          | Calmodulin (C-lobe)                                | Fully occupied (4Ca <sup>2+</sup> )                                                       | CaM bound to Ora1 peptide (no interactions with N-lobe)                                     |
| 18                                                                                           | 3sui-A       | 14      | 1                    | 67                  | 146                       | 100          | Calmodulin (C-lobe)                                | Fully occupied (4Ca <sup>2+</sup> )                                                       | CaM bound to trp1 c-terminal peptide                                                        |
| 19                                                                                           | 4rjd-A       | 14      | 0.7                  | 66                  | 66                        | 100          | Calmodulin (C-lobe)                                | Both EF hands coordinate Ca <sup>2+</sup>                                                 | CaM C-lobe bound to trifluoperazine                                                         |
| 20                                                                                           | 1exr-A       | 14      | 0.7                  | 67                  | 146                       | 84           | Calmodulin (C-lobe)                                | Fully occupied (4Ca <sup>2+</sup> )                                                       | Ca <sup>2+</sup> -bound CaM at atomic (1 Å) resolution                                      |
| <b>Search performed with full-length (2-147) Chain B from CaM - AKAP79 (77-92) structure</b> |              |         |                      |                     |                           |              |                                                    |                                                                                           |                                                                                             |
| 1                                                                                            | 1mxe-B       | 14.7    | 2.6                  | 103                 | 144                       | 75           | Calmodulin                                         | Fully occupied (4Ca <sup>2+</sup> )                                                       | <i>Drosophila</i> CaM bound to target sequence of CaM-dependent protein kinase I            |
| 2                                                                                            | 3sg6-A       | 14.6    | 3.6                  | 129                 | 387                       | 100          | Calmodulin                                         | Fully occupied (4Ca <sup>2+</sup> )                                                       | CaM fused within sequence of GCaMP3 variant                                                 |
| 3                                                                                            | 4q5u-A       | 14.5    | 3.3                  | 135                 | 145                       | 96           | Calmodulin                                         | Fully occupied (4Ca <sup>2+</sup> )                                                       | CaM bound to its recognition site from calcineurin (1:1 conformation)                       |
| 4                                                                                            | 2w73-A       | 14.5    | 12.1                 | 93                  | 145                       | 88           | Calmodulin (C-lobes aligned)                       | Fully occupied (4Ca <sup>2+</sup> )                                                       | CaM bound to its recognition site from calcineurin (2:2 conformation)                       |
| 5                                                                                            | 3oxq-C       | 14.4    | 3.1                  | 136                 | 145                       | 100          | Calmodulin                                         | Fully occupied (4Ca <sup>2+</sup> )                                                       | Match is to CaM bound to Cav1.2 IQ domain sequence                                          |
| 6                                                                                            | 3sg6-A       | 14.4    | 3.6                  | 129                 | 383                       | 100          | Calmodulin                                         | Fully occupied (4Ca <sup>2+</sup> )                                                       | CaM fused within sequence of GCaMP2-LIA                                                     |
| 7                                                                                            | 4agr-A       | 14.4    | 4.3                  | 129                 | 145                       | 98           | Calmodulin-7                                       | Fully occupied (4Ca <sup>2+</sup> )                                                       | In complex with the regulatory domain of a plasma-membrane Ca <sup>2+</sup> -ATPase         |
| 8                                                                                            | 3sjq-B       | 14.4    | 13.8                 | 122                 | 145                       | 100          | Calmodulin                                         | Fully occupied (4Ca <sup>2+</sup> )                                                       | Bound to small conductance potassium channel splice variant (2:2 conformation)              |
| 9                                                                                            | 1ggz-A       | 14.3    | 7                    | 90                  | 144                       | 66           | Calmodulin-related protein NB-1 (C-lobes aligned)  | Fully occupied (4Ca <sup>2+</sup> )                                                       | Protein expressed in epithelial cells                                                       |
| 10                                                                                           | 1osa-A       | 14.3    | 14.3                 | 123                 | 148                       | 87           | Calmodulin                                         | Fully occupied (4Ca <sup>2+</sup> )                                                       | Paramecium CaM                                                                              |
| 11                                                                                           | 3u0k-A       | 14.2    | 3.8                  | 131                 | 397                       | 95           | Calmodulin                                         | Fully occupied (4Ca <sup>2+</sup> )                                                       | CaM fused within sequence of RCaMP                                                          |
| 12                                                                                           | 5e1k-A       | 14.2    | 14.1                 | 123                 | 145                       | 81           | Calmodulin                                         | Fully occupied (4Ca <sup>2+</sup> )                                                       | Selenomethionine Calmodulin from Paramecium                                                 |
| 13                                                                                           | 3cln-A       | 14.2    | 14.3                 | 120                 | 143                       | 99           | Calmodulin                                         | Fully occupied (4Ca <sup>2+</sup> )                                                       | First high-resolution structure of Ca <sup>2+</sup> -CaM                                    |
| 14                                                                                           | 1niw-C       | 14.1    | 3.2                  | 120                 | 145                       | 80           | Calmodulin                                         | Fully occupied (4Ca <sup>2+</sup> )                                                       | CaM bound to its recognition site in endothelial nitric oxide synthase                      |
| 15                                                                                           | 2vay-A       | 14.1    | 3.3                  | 134                 | 146                       | 100          | Calmodulin                                         | Fully occupied (4Ca <sup>2+</sup> )                                                       | CaM bound to Cav1.1 IQ domain                                                               |
| 16                                                                                           | 3dvm-A       | 14.1    | 4.8                  | 123                 | 140                       | 89           | Calmodulin                                         | Fully occupied (4Ca <sup>2+</sup> )                                                       | CaM bound to Cav2.1 IQ domain                                                               |
| 17                                                                                           | 2obh-B       | 14.1    | 11.9                 | 98                  | 143                       | 44           | Centrin-2 (C-lobes aligned)                        | N-lobe EF hands are unoccupied, both C-lobe EF hands coordinate Ca <sup>2+</sup>          | CaM bound to its recognition site from xeroderma pigmentosum group C protein                |
| 18                                                                                           | 3dvc-A       | 14      | 4.7                  | 125                 | 143                       | 87           | Calmodulin                                         | Fully occupied (4Ca <sup>2+</sup> )                                                       | CaM bound to Cav2.3 IQ domain                                                               |
| 19                                                                                           | 4zlk-B       | 14      | 5.8                  | 115                 | 133                       | 100          | Calmodulin                                         | Fully occupied (4Ca <sup>2+</sup> )                                                       | CaM bound to Myosin VA                                                                      |
| 20                                                                                           | 3qix-A       | 13.9    | 1.5                  | 70                  | 145                       | 49           | Centrin (CaM C-lobe aligned to centrin N-lobe)     | Fully occupied (4Ca <sup>2+</sup> )                                                       | Bound to mellitin                                                                           |

**Supplementary Table 2. Structural homologs identified using DALI.** Homologous structures are listed for full-length CaM (2-147), and for isolated N-lobe (2-79) or C-lobe (80-147). Searches were performed using chain B of the crystal structure (5NIN). In each category, the top twenty highest scoring structures are listed. In cases where multiple chains within the same asymmetric unit or NMR assembly scored highly, only the highest scoring chain is listed. For matches to CaM in complex with target proteins/peptides, only the highest scoring PDB match for the complex type is listed (with the exception of 4Q5U and 2W73, which represent respective 1:1 and 2:2 configurations with calcineurin). For matches against non-CaM proteins, e.g. Troponin-C, only the highest scoring PDB match is listed. Structural models deposited in the PDB were excluded from the list.

## Supplementary Table 3

| Score | Accession    | Protein Name                                                                                          | Position of central Trp | Sequence of predicted site                  | Molecular Weight |
|-------|--------------|-------------------------------------------------------------------------------------------------------|-------------------------|---------------------------------------------|------------------|
| 0     | AKAP5_HUMAN  | AKAP79                                                                                                | W79                     | PEPTRGAWASLKRRLVTRKRSESSKQKPLEGEMQPA        | 47094.4          |
| 0.183 | HNRPM_HUMAN  | Heterogeneous nuclear ribonucleoprotein M                                                             | W84                     | NIFFDVKVQSLKDLVKEKVEYTVVLELLMDAEGKSRG       | 77525.9          |
| 0.183 | CAC1A_HUMAN  | Voltage-dependent P/Q-type calcium channel subunit alpha-1A (Cav2.1)                                  | W597                    | IFKVTYKVASLNRNLVSVLLNSMKSIIISLLELFLPFI      | 282400.4         |
| 0.183 | CAC1B_HUMAN  | Voltage-dependent N-type calcium channel subunit alpha-1B (Cav2.2)                                    | W592                    | IFKVTYKVASLNRNLVSVLLNSMKSIIISLLELFLPFI      | 262529.6         |
| 0.183 | CAC1E_HUMAN  | Voltage-dependent R-type calcium channel subunit alpha-1E (Cav2.3)                                    | W586                    | IFKVTYKVASLNRNLVSVLLNSMKSIIISLLELFLPFI      | 261764.5         |
| 0.183 | YK026_HUMAN  | Putative uncharacterized protein LOC100129027                                                         | W112                    | TPPLTKTWSLRLALVYRVNLSSESRVLRQREKGLVDSF      | 16805.6          |
| 0.189 | AKA12_HUMAN  | A-kinase anchor protein 12 (Gravin)                                                                   | W759                    | EGEGVSTWSESPKRLVTPRKKSKSLEEKSEDSIAGSG       | 191507.2         |
| 0.234 | PDE1A_HUMAN  | Calcium/calmodulin-dependent 3',5'-cyclic nucleotide phosphodiesterase 1A (PDE1A)                     | W316                    | INLSKDDVADLNRNLVIEMLVSTDMGSHFQQKINRNS       | 61259.6          |
| 0.291 | FGL1_HUMAN   | Fibrinogen-like protein 1                                                                             | W292                    | WYTHWGVYSLKSVVMKIRPNDFIPNVI (C-term)        | 36383.9          |
| 0.291 | BCL2_HUMAN   | Apoptosis regulator Bcl-2                                                                             | W214                    | RPLDFDFWLSLRTLLSLALVGACITLGGAYLGHK (C-term) | 26269.3          |
| 0.291 | DYH10_HUMAN  | Dynein heavy chain 10                                                                                 | W4077                   | QRDRPIFQSGSLKYLIGEVHMGRAIDSFDRILITLYM       | 514904.5         |
| 0.297 | LRFN2_HUMAN  | Leu-ric repeat and fibronectin type-III domain-containing protein 2/Synaptic adhesion-like molecule 1 | W166                    | NNLHGLFQDSVRRMVLHQLSDHNLHLLHAEOTPAD         | 84741.9          |
| 0.329 | HUS1B_HUMAN  | Checkpoint protein HUS1B                                                                              | W162                    | ASIRLPRFQTRLSRIVERMANVGSVLEAVLNSGRMTL       | 30985.9          |
| 0.329 | K1841_HUMAN  | Uncharacterized protein KIAA1841                                                                      | W36                     | GIPQITMWTTLARLVPLGTPKCAKRRDELKSSGGSP        | 82017.4          |
| 0.329 | LPAR1_HUMAN  | Lysophosphatidic acid receptor 1                                                                      | W45                     | GKHLATEWNTVSKLVMLGLTVCFIIMLANLLVMVAI        | 41114.6          |
| 0.329 | SCNNB_HUMAN  | Amiloride-sensitive sodium channel subunit beta/Epithelial Na(+) channel subunit beta                 | W549                    | EIIIDFVWTTIKLVALKSLRQRRAQASVAGPPTV          | 72668.3          |
| 0.329 | DDX60_HUMAN  | Probable ATP-dependent RNA helicase DEAD box protein 60                                               | W142                    | MKDYEYLWNTVSKLVRDFVGGQFPRLRTTKVCFLEKK       | 197877.5         |
| 0.329 | TLR8_HUMAN   | Toll-like receptor 8                                                                                  | W1015                   | PKAEGLEWQTLRNVTLENDISRVNMYVDSIKQY (C-term)  | 119843.1         |
| 0.342 | KIF1B_HUMAN  | Kinesin-like protein KIF1B                                                                            | W1308                   | EKGSLEWQDRELVVGRINRKNPEVDEAAVDAVLLSN        | 204502.2         |
| 0.342 | BIG2_HUMAN   | Brefeldin A-inhibited guanine nucleotide-exchange protein 2 (BIG2)                                    | W1371                   | HTFEKHVQDLFRIVFRIFDNMKLPEQLSEKSEWMTT        | 202063.8         |
| 0.342 | BIG1_HUMAN   | Brefeldin A-inhibited guanine nucleotide-exchange protein 1 (BIG1)                                    | W1424                   | HTYKHWQDLFRIVFRIFDNMKLPEQQLSEKSEWMTT        | 208793.5         |
| 0.342 | DYHC2_HUMAN  | Cytoplasmic dynein 2 heavy chain 1                                                                    | W1210                   | EHLSPDHVLDLFRLLGLPRGTSLEKLLFGDLRVAVD        | 492683.4         |
| 0.342 | TSNA1_HUMAN  | t-SNARE domain-containing protein 1                                                                   | W188                    | VVDLKHQVLDLRAVRRKLDGLRKAHGPSFGSKPQ          | 55956.1          |
| 0.342 | WDR87_HUMAN  | WD repeat-containing protein 87                                                                       | W10                     | SPRLPLQVLDKLLNDNTINKSKQSPEDPKNCLIVLS        | 33226.1          |
| 0.348 | ACSM6_HUMAN  | Acyl-coenzyme A synthetase ACSM6                                                                      | W196                    | SDKSYDQWLDKFKLQVAPPKQTYMRTSKQDPMIFP         | 53591.9          |
| 0.366 | MFS07_HUMAN  | Major facilitator superfamily domain-containing protein 7                                             | W70                     | LSMEQINWLSLVVVTTPGVAIIVLSDVGLRAAT           | 58435.1          |
| 0.366 | CAC1C_HUMAN  | Voltage-dependent L-type calcium channel subunit alpha-1C (Cav1.2)                                    | W634                    | IFK1TRYWNSLNLVSVLLNSMKSIIASLLELFLPFI        | 294008.3         |
| 0.366 | CAC1F_HUMAN  | Voltage-dependent L-type calcium channel subunit alpha-1F (Cav1.4)                                    | W639                    | IFK1TRYWNSLNLVSVLLNSMKSIIASLLELFLPFI        | 220706.2         |
| 0.366 | ANTR1_HUMAN  | Anthrax toxin receptor 1                                                                              | W15                     | ALGIGFQWLSLTLVLIACAGQGGRRDGGPCYGGDF         | 62799.7          |
| 0.366 | BPI_HUMAN    | Bactericidal permeability-increasing protein                                                          | W15                     | GPCNAPRWASLMLVVAIGTAVTAANVGVVRSIQGK         | 53906.6          |
| 0.366 | CAC1D_HUMAN  | Voltage-dependent L-type calcium channel subunit alpha-1D (Cav1.3)                                    | W633                    | IFK1TRYWNSLNLVSVLLNSMKSIIASLLELFLPFI        | 245171.9         |
| 0.366 | CAC1S_HUMAN  | Voltage-dependent L-type calcium channel subunit alpha-1S (Cav1.1)                                    | W542                    | IFK1TRYWNSLNLVSVLLNSMKSIIASLLELFLPFI        | 212376.9         |
| 0.366 | RTX2_HUMAN   | Receptor-transferring protein 2                                                                       | W205                    | SLRWLCLWASLCLLVVYVYQFSTLSDAFF (C-term)      | 26070.9          |
| 0.372 | KCNT2_HUMAN  | Potassium channel subfamily T member 2                                                                | W156                    | PFITISIFWLSLRLVPLVFLNCLWALHLENINDLH         | 130517.4         |
| 0.372 | ANR17_HUMAN  | Ankyrin repeat domain-containing protein 17                                                           | W2566                   | PHAADPSWNSLKVMSVSTENNGPQVVTGQPAWAKN         | 274295.1         |
| 0.378 | AKA12_HUMAN  | A-kinase anchor protein 12 (Gravin)                                                                   | W610                    | KREGVTFWASPKHVVTPKRRVRRSESSKDELDHVV         | 191507.2         |
| 0.378 | THS7B_HUMAN  | Thrombospondin type-1 domain-containing protein 7B                                                    | W14                     | LTVTCVWQSMRKLRLLSLKLISHAAHLEKGDNDFI         | 179425.4         |
| 0.399 | G137B_HUMAN  | Integral membrane protein GPR137B                                                                     | W88                     | FLFLCLFQASLRTVLFYFQDFVAANSLSPFVWLL          | 45604.8          |
| 0.399 | GP144_HUMAN  | Probable G-protein coupled receptor 144                                                               | W478                    | EEQVADTWLSLREVIQGMALVAVSQRLAPLSTSMT         | 104101.1         |
| 0.399 | LCN12_HUMAN  | Epididymal-specific lipocalin-12                                                                      | W10                     | LLCGLWLSLKLVAQQTPTPLPFPQSGFQGNF             | 21502.3          |
| 0.399 | LTN1_HUMAN   | E3 ubiquitin-protein ligase listerin                                                                  | W712                    | LTVDLQWLSLKLKLEKACPSDHALVTPWLKGLV           | 200577.2         |
| 0.399 | AT12A_HUMAN  | Potassium-transporting ATPase alpha chain 2                                                           | W433                    | FDQSSRTWASLKSIIITLNCNRAEFKQGVNIMKXAV        | 115525.4         |
| 0.399 | TEX15_HUMAN  | Testis-expressed sequence 15 protein                                                                  | W17                     | NGDLLWLSLKLKLEKACPSDHALVTPWLKGLV            | 315376.1         |
| 0.399 | TRIO_HUMAN   | Triple functional domain protein                                                                      | W135                    | VDMRGSQVDSIKPDKLILQSEFPCCIHVALLIKPND        | 346944.3         |
| 0.404 | KCNCA4_HUMAN | Potassium voltage-gated channel subfamily C member 4 (Kv3.4)                                          | W291                    | IEGVCLVQVTFLEFLVRI VCCPDTLDLKNVLLIDFV       | 69795.8          |
| 0.404 | NYNR1_HUMAN  | NYN domain and retroviral integrase catalytic domain-containing protein                               | W104                    | LFGLDCLQSTLAVLVPQPPGSLMSTFESIMTQNW          | 208393.4         |
| 0.404 | S39A7_HUMAN  | Zinc transporter SLC39A7                                                                              | W18                     | VAVGLTWLGLLGLVAGLGGHDDHLDQDFHGHSS           | 50124.8          |
| 0.404 | S22AF_HUMAN  | Solute carrier family 22 member 15                                                                    | W224                    | LGYFTRSGRTLAIVLNLQGTVVFLLSLPIPEPWRWLY       | 60548            |
| 0.404 | CBP_HUMAN    | CREB-binding protein                                                                                  | W1686                   | SSLRKSQWSTLCLMVELLHFGQDRFVYTCNCKRHVE        | 263585.7         |
| 0.404 | AKA12_HUMAN  | A-kinase anchor protein 12 (Gravin)                                                                   | W804                    | EPKKEEWSLKKFIPGRKRPDQKQVAVEDAGP             | 191507.2         |
| 0.409 | D0CK2_HUMAN  | Dedicator of cytokinesis protein 2                                                                    | W380                    | DSGGQGLVPTMKLWGDIIIRKDVPHLVDFTVAVR          | 211974.4         |
| 0.409 | WDR34_HUMAN  | WD repeat-containing protein 34                                                                       | W188                    | GRLDHGDWSTLKSFPVCAWNLDRDLRQPPQSAVVEP        | 57808.2          |
| 0.417 | FBX44_HUMAN  | F-box only protein 44                                                                                 | W37                     | CRVCSLQVLDLIDLVTLMKRKLREGFTEDDQVPA          | 29750.4          |
| 0.417 | MPRD_HUMAN   | Cation-dependent mannose-6-phosphate receptor                                                         | W229                    | QPFLAFWQDLGNLVDGCGFVCRNKPFPVPAARYV          | 30997.2          |
| 0.417 | COCA1_HUMAN  | Collagen alpha-1(XII) chain                                                                           | W138                    | OKCSVAWTDLVFLVDGWSVGNRNFYILDFIAALV          | 333190.5         |
| 0.423 | DYH11_HUMAN  | Dynein heavy chain 11                                                                                 | W4139                   | EANSKVFQEDLRFYFGEIMYGGHITDDWDRKLCRYL        | 521107.7         |
| 0.423 | GRIA4_HUMAN  | Glutamate receptor 4 (AMPA 4)                                                                         | W390                    | GNPKVGVNDMDKLVLIQDVPFLGNDTAAENRTVVV         | 110083.8         |
| 0.423 | MDN1_HUMAN   | Midasin                                                                                               | W761                    | TCYRKRWHLDRMLQHVHSAVNDKQDSSTGLLKL           | 632899.7         |
| 0.423 | ACSM1_HUMAN  | Acyl-coenzyme A synthetase ACSM1, mitochondrial                                                       | W196                    | SDHSREGWLDPRSLVKSASPEHTCKSITLDPWIFP         | 65281.4          |
| 0.423 | DYH17_HUMAN  | Dynein heavy chain 17, axonemal                                                                       | W4072                   | EANPKVQVLDLRFYFGEIMYGGHITDDWDRKLCRYL        | 511850.9         |
| 0.437 | D0CD2B_HUMAN | Doublecortin domain-containing protein 2B                                                             | W156                    | SAQASQWETVTKLLTEKVKLQSGAVCKLCTLEGLPL        | 37669.9          |
| 0.437 | MCF2_HUMAN   | Proto-oncogene DBL                                                                                    | W186                    | HRQISGDWQNTINKLLTQVHDMETAFDQWFKHQLRKE       | 107686.4         |
| 0.437 | ANKY1_HUMAN  | Ankyrin repeat and MYND domain-containing protein 1                                                   | W527                    | MIERRKWRRTIKLLRRGADPNLCCVPMQVFLAVKA         | 105529.1         |
| 0.437 | CALL6_HUMAN  | Calmodulin-like protein 6                                                                             | W129                    | EGKGYIDWNTLKYVLMNAGEPLNEVEAQMKKADK          | 20692.8          |
| 0.437 | TM41A_HUMAN  | Transmembrane protein 41A                                                                             | W219                    | SLDALFSGDVTFKLLAIAMVALIPIVTLIKKFSQKHLQ      | 29668.9          |
| 0.437 | SYNE1_HUMAN  | Nesprin-1                                                                                             | W5944                   | LGDLQSGWSTLKNVISEKQRTLYALERQKYQDSLQ         | 101153.6         |
| 0.437 | UBR1_HUMAN   | E3 ubiquitin-protein ligase UBR1                                                                      | W1558                   | FLFLFQVWTFRPLRQKWDALMLNCLIKGNTPVRY          | 200235.6         |
| 0.442 | TAM41_HUMAN  | Mitochondrial translocator assembly and maintenance protein 41 homolog                                | W10                     | LQTLQSGWSTLKNVISEKQRTLYALERQKYQDSLQ         | 35911.9          |
| 0.45  | IF172_HUMAN  | Intraflagellar transport protein 172 homolog                                                          | W1503                   | CAEAYHSWADLDRVNLNENLVKSEANSAPHEEFK          | 197600.9         |
| 0.45  | MYH10_HUMAN  | Myosin-10                                                                                             | W619                    | DRFVAELQVDDVDRIVGLDQVTGMFTAFQSAYKTKKG       | 229027.3         |
| 0.45  | MYH11_HUMAN  | Myosin-11                                                                                             | W619                    | DKFVADLQVDDVDRIVGLDQVTGMFTAFQSAYKTKKG       | 227367.4         |
| 0.45  | PNM1_HUMAN   | PNMA-like protein 1                                                                                   | W121                    | LDAGRTVQEDVRRLLQNLNPTLSQNHGPPENWAEAL        | 48166.9          |
| 0.45  | BRD1_HUMAN   | Bromodomain-containing protein 1                                                                      | W697                    | APRRPFSQEDVRRLLQNLNPTLSQNHGPPENWAEAL        | 119535.2         |
| 0.45  | TD0D6_HUMAN  | Tudor domain-containing protein 6                                                                     | W580                    | GNSENVQVYDVRMLLPQFRQLPILAVKCTLADINWPLG      | 236547.4         |
| 0.45  | TR142_HUMAN  | Tripartite motif-containing protein 42                                                                | W690                    | NDNPGQWSDICKVVTVDGHNKRAKGLLNLQSALE          | 82755.1          |
| 0.474 | DOP1_HUMAN   | Protein dopey-1                                                                                       | W1921                   | VPNLVDSWASLILLKDSIQLSLEPAPGQFLLIGVQNE       | 277389.8         |
| 0.474 | ERAP1_HUMAN  | Endoplasmic reticulum aminopeptidase 1                                                                | W617                    | VHVEDDQVDSLTKLGGTHTVAVSSNDRASSLINNAIF       | 107248.2         |
| 0.474 | GTR12_HUMAN  | Solute carrier family 2, facilitated glucose transporter member 12                                    | W462                    | DVPAFLWLSLASSLLVYVAASIGLGMPLVLSIEF          | 66975.2          |
| 0.474 | K1468_HUMAN  | LisH domain and HEAT repeat-containing protein KIAA1468                                               | W826                    | EQEGTQWSESLWVNVQLPOLIEIVGKINVTSTVC          | 134647.1         |
| 0.474 | KCNG1_HUMAN  | Potassium voltage-gated channel subfamily G member 1                                                  | W278                    | VESVCGVWFLSLEFLRLIQAPSKFALRSLPTLIDL         | 57920.1          |
| 0.474 | LEM02_HUMAN  | LEM domain-containing protein 2                                                                       | W216                    | WLSRLLWASLGLLVFLGLVLMKMGKPSAPQEAEDN         | 56982.3          |
| 0.474 | KS64A_HUMAN  | Ribosomal protein S6 kinase alpha-4                                                                   | W221                    | GKGAVDWNSLGIPELLTGGASPTLEGERNTQAEV          | 85016.8          |
| 0.474 | NCKX1_HUMAN  | Sodium/potassium/calcium exchanger 1                                                                  | W584                    | LDGLAWNSLGLLVAFVFTMKNHIEVWVWQ               | 121389.8         |
| 0.474 | NOX1_HUMAN   | NADPH oxidase 1                                                                                       | W9                      | GNWVNHVSVLFLVWVGLNWFPLDPLKYEKADK            | 64879.1          |
| 0.474 | MTA2_HUMAN   | Metastasis-associated protein MTA2                                                                    | W297                    | TRDPLFQWLSLAVIQVYVHMTTDRYIQQRKKAEE          | 75032.6          |
| 0.474 | PEX12_HUMAN  | Peroxisome assembly protein 12                                                                        | W114                    | GLPKQQLWNSLIMVLLPYLKVLEKLVSLREDEY           | 48002.4          |
| 0.474 | PONL1_HUMAN  | Podocan-like protein 1                                                                                | W9                      | AESGLAWNSLGLLVFLGLVLMKMGKPSAPQEAEDN         | 56546.6          |
| 0.474 | ABCA7_HUMAN  | ATP-binding cassette sub-family A member 7                                                            | W1965                   | PSARFNLNSLAVVREGRVSLMTHSMECEALCSR           | 234380.3         |
| 0.474 | ADCK2_HUMAN  | Uncharacterized aarF domain-containing protein kinase 2                                               | W343                    | GVLPQVWNSLGLLVAFVFTMKNHIEVWVWQ              | 68990.7          |
| 0.474 | BIG2_HUMAN   | Brefeldin A-inhibited guanine nucleotide-exchange protein 2 (BIG2)                                    | W1709                   | SESHREAWSTLLELTKLTKLNDKFKAHASMYPPY          | 202063.8         |
| 0.474 | ATG4D_HUMAN  | Cysteine protease ATG4D                                                                               | W297                    | RPPDPAWNSVIVLVPVRLGGTINFPVYVPCVLELR         | 52929.1          |
| 0.474 | ANR57_HUMAN  | Ankyrin repeat domain-containing protein 57                                                           | W280                    | LSASDQWVDSLEGLTCEPGLLKRDPITGFTCLHWA         | 55675.9          |
| 0.474 | ABCAD_HUMAN  | ATP-binding cassette sub-family A member 13                                                           | W3796                   | FFPTASVWNSVGLVEKRVQFLSSSLFFNFNDKNG          | 576231.6         |
| 0.474 | COX15_HUMAN  | Cytochrome c oxidase assembly protein COX15 homolog                                                   | W239                    | VLYCASLWSTLLELPPHKLPTHQLQRRFAHTA            | 46036            |
| 0.474 | C1004_HUMAN  | Uncharacterized protein C9orf4                                                                        | W63                     | RPHQFVWASLLELTPGAAACASPADGAGPGGR            | 37275            |
| 0.474 | S39AD_HUMAN  | Zinc transporter ZIP13                                                                                | W347                    | LLEEDPQWNSLQQLLLCAGIVMVLVFLSFDV (C-term)    | 39015.9          |
| 0.474 | SRBP1_HUMAN  | Sterol regulatory element-binding protein 1                                                           | W876                    | WDPVAKWASLTVAVIHWLRDEEAERLCLPVEHL           | 121691.4         |
| 0.474 | TLR2_HUMAN   | Toll-like receptor 2                                                                                  | W386                    | NSACEDAWPSLQTLILRQNHLSLEKGTETLLTKRL         | 89448.8          |
| 0.474 | TMCC2_HUMAN  | Transmembrane and coiled-coil domains protein 2                                                       | W695                    | FLLLWNSLGLLVAFVFTMKNHIEVWVWQ (C-term)       | 77458.7          |
| 0.474 | TM178_HUMAN  | Transmembrane protein 178                                                                             | W262                    | SWSIFCAWNSLGLVIAAGGLCAITVPIIRTKIVHLKS       | 33022.8          |

**Supplementary Table 3. Search results for putative 1-4-7-8 motifs.** The top 100 best scoring matches retrieved by Scansite 3 within the human proteome to a 1-4-7-8 motif search matrix are listed.

**Supplementary Table 4**

| <b>Name</b>                | <b>Sequence (5' to 3')</b>                                               |
|----------------------------|--------------------------------------------------------------------------|
| BamH1_RIIalpha_M1          | TGGATCCATGAGCCACATCCAGATCCCG                                             |
| RIIalpha_R45stop_Xho1_Not1 | ATAAGAATGCGGCCGCATGTATATCTCCTCGAGTT<br>ATCATGGGGCGCGGGCC                 |
| Xho1_SD_6His_AKAP79_M1     | ATCGCTCTCGAGGAGATATACATATGCATCATCAC<br>CATCATCATATGGAAACCACAATTCAGAAATTC |
| AKAP79_Q427stop_Not1       | ATAAGAATGCGGCCGCTCACTGTAGAAGATTGTTT<br>ATTTATTATCATCAGAG                 |

**Supplementary Table 4. Oligonucleotide primer sequences.** Primers are listed for constructing a bicistronic vector based on pGEX6P1 containing RII $\alpha$  (1-45) fused to the C-terminus of GST with AKAP79 bearing an N-terminal 6His tag in the second cistron.
